# Supplementary material for: Evolution and comparative genomics of the most common Trichoderma species
Source: PubMed Central journal article supplement (PMC6560777; doi:10.1186/s12864-019-5680-7), 2019-06-12
Supplement: 12864_2019_5680_MOESM9_ESM.pdf [file 12864_2019_5680_MOESM9_ESM.pdf]

# Intraspecific variation in *Trichoderma harzianum* as estimated based on the analysis of the two strains

## Contents

|                       |   |
|-----------------------|---|
| Th <sub>T</sub> ..... | 1 |
| Th.....               | 5 |

Having two isolates from the same species (*T. harzianum*) available, we were interested in the possible differences in their genomes. A comparison showed that 1 699 genes of strain *T. harzianum* CBS 226.95 (type - Th<sub>T</sub>) (12 %) were absent from strain *T. harzianum* (Th), and 1 419 genes of the latter (10.1 %) absent from Th<sub>T</sub>. Most of these genes encoded orphan proteins, and a function could only be predicted for 158 and 160 genes in Th<sub>T</sub> and Th, respectively (Table 1). In both cases, proteins with ankyrin repeats (34 vs. 23, respectively) accounted for the highest number. Besides this, the composition of the two gene pools was different: Th had 11 unique Zn<sub>2</sub>Cys<sub>6</sub> transcriptional regulators, whereas Th<sub>T</sub> only three. On the other hand, the unique genes of the latter contained three genes encoding proteins of the Dimer\_Tnp\_hAT (zinc fingers/transposases) and six genes encoding EEP-superfamily AP-endonucleases, which were absent from Th.

Table 1: Orphan genes in individual strains of *T. harzianum*

| Protein ID      | E-Value   | Bitscore | Accession | Short name                |
|-----------------|-----------|----------|-----------|---------------------------|
| Th <sub>T</sub> |           |          |           |                           |
| 5               | 3,31E-43  | 173.233  | cl12078   | p450 superfamily          |
| 505941          | 3,64E-136 | 448.046  | cd05930   | A_NRPS                    |
| 509829          | 9,75E-118 | 367.607  | cd13970   | ABC1_ADCK3                |
| 479909          | 3,62E-07  | 618.295  | cl21494   | Abhydrolase superfamily   |
| 493457          | 4,03E-13  | 756.242  | pfam00583 | Acetyltransf_1            |
| 555787          | 7,51E-08  | 614.079  | cl08282   | Acyl_transf_1 superfamily |
| 502041          | 2,43E-33  | 130.82   | cd01428   | ADK                       |
| 76331           | 4,49E-44  | 156.311  | cl17173   | AdoMet_MTases superfamily |
| 7387            | 6,70E-27  | 116.06   | cl26705   | AIR1 superfamily          |
| 55675           | 1,59E-23  | 104.504  | cl26705   | AIR1 superfamily          |
| 68770           | 4,37E-39  | 139.826  | cd00204   | ANK                       |
| 63203           | 4,55E-31  | 131.737  | cd00204   | ANK                       |
| 96791           | 9,99E-31  | 119.796  | cd00204   | ANK                       |
| 16486           | 2,70E-29  | 127.5    | cd00204   | ANK                       |
| 551129          | 1,97E-27  | 118.255  | cd00204   | ANK                       |
| 66970           | 2,95E-25  | 104.773  | cd00204   | ANK                       |

|        |           |         |            |                                      |
|--------|-----------|---------|------------|--------------------------------------|
| 44203  | 5,52E-25  | 103.232 | cd00204    | ANK                                  |
| 39922  | 6,05E-24  | 997.654 | cd00204    | ANK                                  |
| 95090  | 1,74E-23  | 110.936 | cd00204    | ANK                                  |
| 91098  | 5,13E-23  | 100.151 | cd00204    | ANK                                  |
| 485886 | 1,03E-22  | 108.625 | cd00204    | ANK                                  |
| 66778  | 1,13E-22  | 943.726 | cd00204    | ANK                                  |
| 97129  | 1,20E-22  | 95.143  | cd00204    | ANK                                  |
| 74810  | 1,25E-20  | 916.762 | cd00204    | ANK                                  |
| 42246  | 1,30E-20  | 920.614 | cd00204    | ANK                                  |
| 76492  | 3,20E-20  | 928.318 | cd00204    | ANK                                  |
| 546880 | 7,97E-18  | 924.466 | cd00204    | ANK                                  |
| 36422  | 3,09E-17  | 828.166 | cd00204    | ANK                                  |
| 554495 | 2,48E-16  | 89.365  | cd00204    | ANK                                  |
| 96787  | 3,14E-16  | 89.365  | cd00204    | ANK                                  |
| 335626 | 8,18E-16  | 882.094 | cd00204    | ANK                                  |
| 53553  | 5,08E-13  | 708.754 | cd00204    | ANK                                  |
| 62568  | 2,56E-12  | 677.938 | cd00204    | ANK                                  |
| 513177 | 6,21E-12  | 754.978 | cd00204    | ANK                                  |
| 486578 | 8,93E-11  | 674.086 | cd00204    | ANK                                  |
| 75602  | 1,61E-10  | 647.122 | cd00204    | ANK                                  |
| 44411  | 2,80E-10  | 64.327  | cd00204    | ANK                                  |
| 505651 | 3,69E-10  | 616.306 | cd00204    | ANK                                  |
| 62242  | 9,26E-10  | 631.714 | cd00204    | ANK                                  |
| 43331  | 1,34E-08  | 597.046 | cd00204    | ANK                                  |
| 46571  | 2,95E-08  | 589.342 | cd00204    | ANK                                  |
| 46902  | 3,43E-06  | 535.414 | cd00204    | ANK                                  |
| 504418 | 2,52E-05  | 52.771  | cd00204    | ANK                                  |
| 307354 | 3,25E-11  | 769.871 | cl26073    | Ank_2 superfamily                    |
| 397141 | 0         | 551.021 | pfam10351  | Apt1                                 |
| 514125 | 9,89E-47  | 166.662 | COG0656    | ARA1                                 |
| 181629 | 1,70E-94  | 283.307 | pfam05856  | ARPC4                                |
| 506612 | 5,10E-15  | 718.095 | pfam04627  | ATP-synt_Eps                         |
| 510620 | 4,17E-18  | 792.094 | pfam04911  | ATP-synt_J                           |
| 75711  | 7,18E-08  | 627.374 | cd14688    | bZIP_YAP                             |
| 2327   | 5,29E-104 | 312.2   | smart01085 | CK_II_beta                           |
| 509278 | 7,64E-09  | 586.637 | pfam14420  | Clr5                                 |
| 81754  | 7,55E-145 | 440.825 | pfam08318  | COG4                                 |
| 488820 | 7,54E-28  | 119.585 | cl09938    | cond_enzymes superfamily             |
| 3574   | 2,00E-09  | 602.692 | pfam05051  | COX17                                |
| 9653   | 1,20E-20  | 983.257 | cl25401    | DEXDc superfamily                    |
| 102899 | 6,91E-12  | 649.737 | pfam05699  | Dimer_Tnp_hAT zin finger/transposase |
| 102332 | 5,52E-06  | 522.621 | pfam05699  | Dimer_Tnp_hAT zin finger/transposase |
| 102764 | 8,06E-06  | 514.917 | pfam05699  | Dimer_Tnp_hAT zin finger/transposase |
| 102891 | 1,53E-05  | 518.769 | pfam05699  | Dimer_Tnp_hAT zin finger/transposase |

|        |           |         |            |                                  |
|--------|-----------|---------|------------|----------------------------------|
| 3404   | 1,75E-88  | 290.686 | cd08771    | DLP_1                            |
| 2723   | 5,15E-117 | 392.402 | COG1112    | DNA2                             |
| 503495 | 9,17E-39  | 138.349 | pfam06993  | DUF1304                          |
| 10467  | 1,14E-16  | 875.008 | cl13276    | DUF3328 superfamily              |
| 86546  | 1,78E-65  | 224.727 | cl16553    | DUF4246 superfamily              |
| 496025 | 1,15E-88  | 271.331 | pfam14124  | DUF4291                          |
| 81722  | 8,20E-21  | 917.857 | pfam14232  | DUF4334                          |
| 7246   | 2,40E-23  | 104.726 | cl26026    | ECR1_N superfamily               |
| 61981  | 1,53E-08  | 585.362 | cl00490    | EEP superfamily, AP-endonuclease |
| 65765  | 1,53E-08  | 585.362 | cl00490    | EEP superfamily, AP-endonuclease |
| 65915  | 1,53E-08  | 585.362 | cl00490    | EEP superfamily, AP-endonuclease |
| 66670  | 1,53E-08  | 585.362 | cl00490    | EEP superfamily, AP-endonuclease |
| 70599  | 1,53E-08  | 585.362 | cl00490    | EEP superfamily, AP-endonuclease |
| 39707  | 1,40E-07  | 585.362 | cl00490    | EEP superfamily, AP-endonuclease |
| 488543 | 1,28E-28  | 131.028 | cd12148    | funga1_TF_MHR                    |
| 98690  | 3,25E-05  | 628.472 | cd12148    | funga1_TF_MHR                    |
| 440598 | 6,27E-05  | 531.326 | smart00066 | GAL4                             |
| 509533 | 1,05E-43  | 158.09  | cd03139    | GATase1_Pfp1_2                   |
| 476765 | 2,84E-07  | 61.984  | pfam01465  | GRIP                             |
| 517912 | 2,33E-11  | 664.823 | cl02776    | GST_C_family superfamily         |
| 524580 | 4,63E-69  | 237.107 | pfam00632  | HECT                             |
| 502100 | 1,91E-38  | 146.089 | cl00275    | Heme_Cu_Oxidase_I superfamily    |
| 118924 | 3,28E-13  | 816.359 | cl06163    | HET superfamily                  |
| 539240 | 2,06E-11  | 720.059 | cl06163    | HET superfamily                  |
| 268489 | 8,24E-05  | 487.698 | cl09264    | HTH_Tnp_Tc3_2 superfamily        |
| 493416 | 3,11E-09  | 610.842 | pfam06766  | Hydrophobin_2                    |
| 517965 | 2,80E-78  | 259.414 | pfam08659  | KR                               |
| 419367 | 1,61E-58  | 208.953 | pfam08659  | KR                               |
| 454456 | 7,00E-52  | 192.389 | pfam08659  | KR                               |
| 267637 | 7,65E-92  | 278.922 | cd03357    | LbH_MAT_GAT                      |
| 430787 | 2,37E-07  | 615.952 | cl01378    | LicD superfamily                 |
| 40729  | 3,92E-09  | 594.348 | pfam00538  | Linker_histone                   |
| 259757 | 1,48E-29  | 136.005 | cl25662    | Lys2b superfamily                |
| 104176 | 1,60E-30  | 120.826 | cd01389    | MATA_HMG-box                     |
| 508975 | 1,74E-28  | 129.356 | cd06174    | MFS                              |
| 312954 | 3,64E-05  | 577.089 | cd06174    | MFS                              |
| 493691 | 1,33E-12  | 761.559 | pfam00153  | Mito_carr                        |
| 498069 | 1,69E-18  | 965.318 | cl28162    | Mito_carr superfamily            |
| 201421 | 0         | 623.069 | cd07415    | MPP_PP2A_PP4_PP6                 |
| 282    | 4,94E-06  | 579.708 | cl13995    | MPP_superfamily superfamily      |
| 383010 | 6,85E-105 | 328.029 | cl27221    | mRNA_cap_C superfamily           |
| 11856  | 0         | 1115.06 | cl25937    | MT superfamily                   |
| 223156 | 2,70E-12  | 741.938 | cl05445    | Mt_ATP-synt_D superfamily        |
| 543016 | 5,33E-45  | 162.037 | cl25327    | NACHT_N superfamily              |

|        |           |         |           |                               |
|--------|-----------|---------|-----------|-------------------------------|
| 513767 | 9,86E-31  | 126.135 | cl21454   | NADB_Rossmann superfamily     |
| 142220 | 1,18E-69  | 245.991 | cl27296   | NarK superfamily              |
| 519762 | 4,12E-127 | 377.598 | cd07564   | nitrilases_CHs                |
| 146347 | 4,87E-33  | 128.715 | pfam04248 | NTP_transf_9                  |
| 490220 | 5,79E-40  | 164.374 | cl12078   | p450 superfamily              |
| 3182   | 2,52E-34  | 145.315 | cl26005   | PLN03088 superfamily          |
| 19562  | 1,78E-16  | 875.465 | cl21455   | P-loop_NTPase superfamily     |
| 133075 | 1,13E-12  | 843.419 | cl21455   | P-loop_NTPase superfamily     |
| 95721  | 8,49E-07  | 646.967 | cl21455   | P-loop_NTPase superfamily     |
| 508167 | 4,30E-06  | 512.296 | pfam01679 | Pmp3                          |
| 513372 | 2,96E-53  | 180.001 | cl25685   | PNPOx_C superfamily           |
| 549944 | 7,59E-59  | 213.4   | cl27709   | Proton_antipo_M superfamily   |
| 102912 | 1,02E-12  | 802.501 | cl27709   | Proton_antipo_M superfamily   |
| 477096 | 5,45E-62  | 200.866 | cd03013   | PRX5_like                     |
| 502098 | 2,03E-18  | 902.264 | cl27766   | QcrB superfamily              |
| 553234 | 2,88E-15  | 826.416 | cl27766   | QcrB superfamily              |
| 95382  | 3,52E-49  | 178.546 | cl28885   | RecA-like_NTPases superfamily |
| 508360 | 3,09E-18  | 988.938 | cl20311   | Ribophorin_II superfamily     |
| 138179 | 2,98E-71  | 225.307 | cd01417   | Ribosomal_L19e_E              |
| 493064 | 6,99E-09  | 552.672 | pfam00832 | Ribosomal_L39                 |
| 514402 | 6,62E-16  | 822.455 | cl14782   | RNase_H_like superfamily      |
| 248881 | 3,57E-05  | 510.645 | cl14782   | RNase_H_like superfamily      |
| 74909  | 2,52E-07  | 572.709 | COG0333   | RpmF                          |
| 367278 | 7,73E-25  | 114.311 | cd01650   | RT_nLTR_like                  |
| 91095  | 3,65E-59  | 207.077 | cl25409   | SDR superfamily               |
| 482875 | 6,08E-53  | 192.987 | cl25409   | SDR superfamily               |
| 488648 | 6,63E-20  | 922.874 | cl25409   | SDR superfamily               |
| 486613 | 1,56E-11  | 711.508 | cl25409   | SDR superfamily               |
| 411621 | 2,93E-67  | 223.547 | pfam06775 | Seipin                        |
| 368002 | 2,00E-11  | 751.236 | COG1676   | SEN2                          |
| 231582 | 3,23E-111 | 382.14  | COG1196   | Smc                           |
| 486332 | 5,04E-18  | 979.385 | COG0513   | SrmB                          |
| 80799  | 1,29E-71  | 237.513 | COG0009   | SUA5                          |
| 2876   | 3,69E-99  | 308.793 | pfam09728 | Taxilin                       |
| 6440   | 1,21E-14  | 848.381 | pfam12009 | Telomerase_RBD                |
| 522572 | 1,74E-76  | 246.731 | pfam00314 | Thaumatococcus                |
| 476434 | 7,46E-13  | 719.938 | cl00388   | Thioredoxin_like superfamily  |
| 420653 | 1,26E-53  | 182.962 | cd07758   | ThTPase                       |
| 509742 | 8,44E-10  | 631.148 | TIGR04076 | TIGR04076                     |
| 7871   | 4,75E-08  | 556.814 | pfam10642 | Tom5                          |
| 510039 | 1,34E-14  | 72.134  | pfam08038 | Tom7                          |
| 125203 | 4,29E-90  | 279.789 | pfam02676 | TYW3                          |
| 478617 | 1,39E-28  | 120.037 | pfam03981 | Ubiq_cyt_C_chap               |
| 551846 | 2,21E-38  | 157.113 | cl27298   | UhpC superfamily              |

|         |           |         |           |                                       |
|---------|-----------|---------|-----------|---------------------------------------|
| 83733   | 4,77E-24  | 984.429 | pfam05254 | UPF0203                               |
| 68176   | 7,86E-19  | 906.735 | cl22977   | UvrD_C_2 superfamily                  |
| 100842  | 5,79E-35  | 137.852 | cl25539   | WD40 superfamily                      |
| 485860  | 0         | 800.645 | cl28315   | XylB superfamily                      |
| 129913  | 1,82E-12  | 723.391 | cl10015   | YjgF_YER057c_UK114_family superfamily |
| 488545  | 3,16E-10  | 754.983 | COG3386   | YvrE                                  |
| 508791  | 5,54E-08  | 619.408 | pfam01428 | zf-AN1                                |
| 7976    | 2,86E-19  | 950.101 | pfam00645 | zf-PARP                               |
| 488615  | 9,44E-29  | 120.907 | cl00064   | ZnMc superfamily                      |
| 509677  | 4,62E-19  | 87.352  | cl00064   | ZnMc superfamily                      |
|         |           |         |           |                                       |
| Th      |           |         |           |                                       |
| 1819495 | 3,64E-78  | 252.548 | cd05339   | 17beta-HSDXI-like_SDR_c               |
| 1819342 | 4,64E-17  | 947.256 | cl28897   | 7tm_GPCRs superfamily                 |
| 1819618 | 0         | 963.614 | PHA00002  | A                                     |
| 181852  | 6,53E-09  | 631.336 | cl21494   | Abhydrolase superfamily               |
| 1819103 | 2,98E-125 | 403.541 | pfam01602 | Adaptin_N                             |
| 1819328 | 1,64E-132 | 407.635 | pfam03155 | Alg6_Alg8                             |
| 1823859 | 1,79E-05  | 501.077 | pfam10471 | ANAPC_CDC26                           |
| 1720709 | 1,59E-30  | 119.025 | cd00204   | ANK                                   |
| 1719114 | 3,88E-24  | 997.654 | cd00204   | ANK                                   |
| 1683779 | 1,06E-22  | 974.542 | cd00204   | ANK                                   |
| 1668933 | 8,44E-22  | 947.578 | cd00204   | ANK                                   |
| 1655210 | 4,48E-20  | 909.058 | cd00204   | ANK                                   |
| 1735942 | 8,69E-20  | 897.502 | cd00204   | ANK                                   |
| 1658401 | 1,22E-19  | 909.058 | cd00204   | ANK                                   |
| 1682284 | 2,22E-18  | 858.982 | cd00204   | ANK                                   |
| 1659581 | 4,63E-18  | 866.686 | cd00204   | ANK                                   |
| 1655576 | 7,48E-18  | 843.574 | cd00204   | ANK                                   |
| 1675034 | 1,79E-17  | 83.587  | cd00204   | ANK                                   |
| 1679631 | 3,87E-16  | 801.202 | cd00204   | ANK                                   |
| 1707891 | 4,27E-16  | 79.735  | cd00204   | ANK                                   |
| 1707907 | 1,47E-15  | 793.498 | cd00204   | ANK                                   |
| 1676974 | 5,43E-15  | 793.498 | cd00204   | ANK                                   |
| 1626541 | 1,53E-14  | 75.883  | cd00204   | ANK                                   |
| 1670470 | 2,74E-14  | 743.422 | cd00204   | ANK                                   |
| 1659605 | 5,08E-13  | 708.754 | cd00204   | ANK                                   |
| 1657030 | 1,86E-12  | 708.754 | cd00204   | ANK                                   |
| 1687250 | 8,29E-11  | 658.678 | cd00204   | ANK                                   |
| 1676697 | 4,22E-10  | 635.566 | cd00204   | ANK                                   |
| 1658056 | 7,69E-10  | 631.714 | cd00204   | ANK                                   |
| 1652605 | 1,33E-09  | 650.974 | cd00204   | ANK                                   |
| 1819272 | 4,36E-155 | 453.096 | pfam03452 | Anp1                                  |

|         |           |         |            |                             |
|---------|-----------|---------|------------|-----------------------------|
| 1819362 | 2,19E-127 | 387.687 | cd01085    | APP                         |
| 1819127 | 0         | 587.837 | cl00279    | APP_MetAP superfamily       |
| 1819118 | 1,26E-127 | 380.773 | TIGR01850  | argC                        |
| 1871608 | 3,73E-91  | 288.816 | cd06097    | Aspergillopepsin_like       |
| 1833612 | 1,29E-44  | 171.62  | pfam10377  | ATG11                       |
| 1656780 | 5,17E-17  | 788.242 | pfam04911  | ATP-synt_J                  |
| 1819122 | 1,41E-90  | 298.984 | COG2303    | BetA                        |
| 1651838 | 5,85E-07  | 594.374 | pfam00144  | Beta-lactamase              |
| 1819327 | 3,69E-160 | 471.89  | cd09245    | BRO1_UmRIM23-like           |
| 1712215 | 1,20E-10  | 692.568 | smart00225 | BTB                         |
| 1819159 | 6,16E-21  | 108.11  | cl25570    | Cation_efflux superfamily   |
| 1786288 | 4,62E-15  | 779.999 | pfam03879  | Cgr1                        |
| 1819322 | 9,21E-31  | 129.968 | pfam13838  | Clathrin_H_link             |
| 1819084 | 4,69E-69  | 273.083 | cl26330    | COG5219 superfamily         |
| 1819120 | 0         | 822.708 | cl26699    | COP-gamma_platf superfamily |
| 167062  | 2,81E-13  | 698.991 | pfam05051  | COX17                       |
| 1819292 | 0         | 696.216 | cl27876    | Cse1 superfamily            |
| 1819326 | 9,59E-77  | 260.083 | COG2072    | CzcO                        |
| 1787236 | 3,83E-102 | 301.471 | PHA00006   | D                           |
| 1819410 | 4,50E-11  | 725.191 | pfam08590  | DUF1771                     |
| 1838481 | 1,73E-05  | 52.478  | pfam08648  | DUF1777                     |
| 1542378 | 9,57E-42  | 159.742 | cl25578    | DUF2855 superfamily         |
| 1671350 | 2,34E-31  | 129.774 | cl25843    | DUF3295 superfamily         |
| 1684390 | 3,87E-20  | 93.664  | cl13276    | DUF3328 superfamily         |
| 1797598 | 7,01E-05  | 555.216 | cl13450    | DUF3505 superfamily         |
| 1819096 | 0         | 580.71  | pfam12054  | DUF3535                     |
| 1853881 | 4,38E-36  | 140.674 | pfam06441  | EHN                         |
| 1701784 | 2,31E-10  | 684.963 | cl27552    | FAD_binding_3 superfamily   |
| 1819282 | 3,19E-50  | 196.512 | cd12148    | funga1_TF_MHR               |
| 1819407 | 3,29E-20  | 108.686 | cd12148    | funga1_TF_MHR               |
| 1819125 | 7,88E-20  | 107.53  | cd12148    | funga1_TF_MHR               |
| 1819216 | 9,62E-20  | 107.145 | cd12148    | funga1_TF_MHR               |
| 1819285 | 2,48E-19  | 104.834 | cd12148    | funga1_TF_MHR               |
| 1706949 | 1,01E-05  | 539.973 | smart00906 | Funga1_trans                |
| 1369275 | 6,51E-35  | 148.719 | pfam11951  | Funga1_trans_2              |
| 1767469 | 3,38E-08  | 639.182 | smart00066 | GAL4                        |
| 130995  | 1,30E-07  | 61.607  | smart00066 | GAL4                        |
| 1258521 | 7,91E-05  | 515.918 | smart00066 | GAL4                        |
| 1819235 | 8,83E-11  | 704.249 | pfam00320  | GATA                        |
| 1720020 | 2,81E-117 | 356.507 | cd08990    | GH43_AXH_like               |
| 1819325 | 4,91E-99  | 313.356 | cd09001    | GH43_XYL_2                  |
| 1819466 | 1,46E-11  | 818.648 | COG0277    | GlcD                        |
| 1722194 | 3,39E-18  | 908.121 | cl14813    | GluZincin superfamily       |
| 1819194 | 3,89E-121 | 375.711 | pfam03659  | Glyco_hydro_71              |

|         |           |         |           |                                          |
|---------|-----------|---------|-----------|------------------------------------------|
| 1854309 | 1,09E-39  | 160.239 | cl02091   | Glyco_transf_15 superfamily              |
| 1819476 | 6,64E-34  | 132.733 | cl02130   | Got1 superfamily                         |
| 1819279 | 4,01E-27  | 129.735 | cl25775   | GppA superfamily                         |
| 1274609 | 1,76E-25  | 100.695 | pfam04568 | IATP                                     |
| 1819179 | 0         | 816.381 | pfam06437 | ISN1                                     |
| 1819317 | 3,19E-82  | 277.508 | cl04955   | LanC_like superfamily                    |
| 1783638 | 5,10E-22  | 964.139 | pfam00538 | Linker_histone                           |
| 1788216 | 5,59E-06  | 624.353 | cl00013   | Lyase_I_like superfamily                 |
| 1819124 | 0         | 539.905 | COG0833   | LysP                                     |
| 1863060 | 5,59E-28  | 121.49  | pfam17043 | MAT1-1-2                                 |
| 1863056 | 5,27E-27  | 108.115 | cd01389   | MATA_HMG-box                             |
| 1434806 | 1,43E-62  | 211.613 | pfam04769 | MATalpha_HMGbox                          |
| 1828769 | 0         | 2163.59 | cl26761   | MDN1 superfamily                         |
| 1848906 | 1,16E-07  | 65.283  | cl16912   | MDR superfamily                          |
| 1819452 | 2,24E-28  | 120.514 | cl10917   | Med8 superfamily                         |
| 1808158 | 1,69E-20  | 957.104 | pfam13649 | Methyltransf_25                          |
| 1787235 | 0         | 576.039 | pfam04687 | Microvir_H                               |
| 1819471 | 1,97E-21  | 103.505 | pfam00153 | Mito_carr                                |
| 1819375 | 0         | 566.969 | cd07414   | MPP_PP1_PPKL                             |
| 1819168 | 5,30E-61  | 219.478 | cl13995   | MPP_superfamily superfamily              |
| 1692229 | 2,39E-19  | 897.798 | cl21454   | NADB_Rossmann superfamily                |
| 1819459 | 8,44E-23  | 116.247 | cl20384   | NatB_MDM20 superfamily                   |
| 1819214 | 0         | 529.901 | cl17037   | NBD_sugar-kinase_HSP70_actin superfamily |
| 1819365 | 2,32E-15  | 913.288 | cl17037   | NBD_sugar-kinase_HSP70_actin superfamily |
| 1819391 | 3,12E-37  | 148.734 | pfam05224 | NDT80_PhoG                               |
| 1819356 | 9,06E-58  | 204.878 | cl17190   | NK superfamily                           |
| 1819145 | 1,23E-100 | 315.364 | pfam04981 | NMD3                                     |
| 1819313 | 3,59E-23  | 123.549 | cl24232   | Nup188 superfamily                       |
| 1819218 | 0         | 680.057 | cl14607   | OPT superfamily                          |
| 1866754 | 1,20E-06  | 579.597 | cl14607   | OPT superfamily                          |
| 1707536 | 7,49E-08  | 547.884 | pfam10215 | Ost4                                     |
| 1819510 | 1,10E-53  | 200.968 | cl12078   | p450 superfamily                         |
| 1819163 | 3,35E-54  | 194.121 | COG3491   | PcbC                                     |
| 1819490 | 3,62E-20  | 103.599 | COG3491   | PcbC                                     |
| 1819224 | 1,09E-105 | 343.432 | cd07489   | Peptidases_S8_5                          |
| 1778820 | 9,98E-14  | 790.719 | pfam04695 | Pex14_N                                  |
| 1787237 | 0         | 730.511 | cl15846   | Phage_F superfamily                      |
| 1787234 | 7,47E-81  | 244.646 | cl11610   | Phage_G superfamily                      |
| 1819465 | 0         | 640.477 | cl27322   | PheS superfamily                         |
| 1819415 | 4,97E-26  | 115.51  | cl17171   | PH-like superfamily                      |
| 1819397 | 1,78E-28  | 127.387 | cd00180   | PKc                                      |
| 1819161 | 2,24E-23  | 112.705 | cl21453   | PKc_like superfamily                     |
| 1819436 | 6,25E-118 | 389.223 | pfam08429 | PLU-1                                    |
| 1819139 | 2,34E-14  | 760.296 | pfam07491 | PPI_Ypi1                                 |

|         |           |         |            |                                       |
|---------|-----------|---------|------------|---------------------------------------|
| 1819301 | 1,35E-10  | 714.314 | pfam07915  | PRKCSH                                |
| 1819109 | 5,00E-128 | 371.577 | cd03761    | proteasome_beta_type_5                |
| 1819182 | 3,62E-70  | 243.324 | pfam08324  | PUL                                   |
| 1819428 | 1,42E-78  | 274.201 | pfam10257  | RAI16-like                            |
| 1799442 | 3,55E-24  | 979.758 | pfam01781  | Ribosomal_L38e                        |
| 1786425 | 6,99E-09  | 552.672 | pfam00832  | Ribosomal_L39                         |
| 1752888 | 8,92E-20  | 896.883 | cd05831    | Ribosomal_P1                          |
| 1786896 | 2,18E-28  | 111.586 | cd05833    | Ribosomal_P2                          |
| 1836906 | 1,43E-07  | 558.235 | smart00659 | RPOLCX                                |
| 1819255 | 1,68E-132 | 429.533 | cl25971    | RSN1_7TM superfamily                  |
| 1809165 | 1,93E-05  | 534.233 | cl21549    | rve superfamily                       |
| 1785912 | 3,24E-24  | 977.059 | cd04457    | S1_S28E                               |
| 1785916 | 3,54E-22  | 107.31  | cl25409    | SDR superfamily                       |
| 1587482 | 1,74E-15  | 827.036 | cl25409    | SDR superfamily                       |
| 1819447 | 1,30E-49  | 177.091 | cd05233    | SDR_c                                 |
| 1819469 | 1,04E-12  | 820.084 | cl21737    | Sds3 superfamily                      |
| 1819440 | 6,17E-125 | 392.602 | cl27768    | SelB superfamily                      |
| 1867908 | 3,73E-09  | 647.685 | cl27768    | SelB superfamily                      |
| 1819354 | 1,75E-39  | 156.341 | smart00317 | SET                                   |
| 1819149 | 0         | 584.37  | COG1196    | Smc                                   |
| 1805959 | 5,85E-06  | 643.187 | cl25732    | SMC_N superfamily                     |
| 1819104 | 4,86E-24  | 109.684 | cl28099    | SmtA superfamily                      |
| 1819277 | 0         | 1121.81 | cl26465    | SNF2_N superfamily                    |
| 1819226 | 6,02E-84  | 276.066 | pfam04086  | SRP-alpha_N                           |
| 1819281 | 2,21E-158 | 473.174 | cd07830    | STKc_MAK_like                         |
| 1819223 | 1,94E-80  | 272.608 | pfam00083  | Sugar_tr                              |
| 1819251 | 0         | 574.115 | cl26602    | SunT superfamily                      |
| 1819258 | 3,26E-101 | 314.415 | cd00757    | ThiF_MoeB_HesA_family                 |
| 1853856 | 7,01E-21  | 962.614 | cl00388    | Thioredoxin_like superfamily          |
| 1719589 | 1,22E-11  | 679.725 | cl00388    | Thioredoxin_like superfamily          |
| 1784854 | 1,29E-05  | 532.562 | pfam03647  | Tmemb_14                              |
| 1809815 | 4,75E-08  | 556.814 | pfam10642  | Tom5                                  |
| 1811287 | 1,34E-14  | 72.134  | pfam08038  | Tom7                                  |
| 1819175 | 0         | 542.824 | cl27547    | TruB_N superfamily                    |
| 1779516 | 1,66E-06  | 544.367 | cd14361    | UBA_HYPK                              |
| 1819230 | 5,52E-33  | 133.822 | cl00155    | UBQ superfamily                       |
| 1819135 | 5,36E-43  | 172.961 | pfam00443  | UCH                                   |
| 1819268 | 2,55E-33  | 144.402 | cl27298    | UhpC superfamily                      |
| 1819080 | 7,43E-17  | 915.033 | pfam02204  | VPS9                                  |
| 1584519 | 7,89E-40  | 142.445 | cl10015    | YjgF_YER057c_UK114_family superfamily |
| 1668876 | 1,17E-06  | 535.288 | pfam13917  | zf-CCHC_3                             |
