# Supplementary material for: Evolution and comparative genomics of the most common Trichoderma species
Source: PubMed Central journal article supplement (PMC6560777; doi:10.1186/s12864-019-5680-7), 2019-06-12
Supplement: 12864_2019_5680_MOESM10_ESM.pdf [file 12864_2019_5680_MOESM10_ESM.pdf]

# Unique genes shared only between facultative pathogenic *Trichoderma* species

We were also interested whether the two species that are most frequently identified as opportunistic pathogens of immunocompromised (and rarely immunocompetent) humans, – *T. longibrachiatum* and *T. citrinoviride* (Kuhls *et al.*, 1999) – would contain unique genes. Reciprocal BLASTP identified 94 genes that were only present in *T. citrinoviride* and *T. longibrachiatum*, and not present in any other *Trichoderma* spp. We could identify putative functions for 53 of them (Table 1). Besides ankyrin-containing proteins and Zn<sub>2</sub>Cys<sub>6</sub> transcriptional regulators, we detected two genes that encoded regulators of the heat shock response (Trilo3: 1397814 and Trilo3: 1337649), and which could theoretically play a role during growth of these two species at temperatures of the human body. In addition, two genes encoding proteins with CFEM (common in fungal extracellular membranes; (Kulkarni *et al.*, 2003)) domains (Trilo3:38581 and Trilo3:4108), and three genes that encode unknown proteins with a single transmembrane domain (Trilo3:583, Trilo3:1187332 and Trilo3:1398588) could play a role in signaling the presence of the animal host. Because of the incompleteness of the *T. longibrachiatum* genome there may be additional genes not detected. Yet, the results obtained open the possibility to investigate *Trichoderma* pathogenicity on humans at the gene level.

Table 1. Unique genes shared by *T. longibrachiatum* and *T. citrinoviride*

| Tlong3.0 | E-Value    | Bitscore | Accession | Short name                        | location | TMs*   |
|----------|------------|----------|-----------|-----------------------------------|----------|--------|
| 4108     | 7,96E-03   | 482.696  | cl02770   | CFEM superfamily                  | secreted | 1 TM o |
| 5483     |            |          |           | ND**                              |          | 1 TM i |
| 18283    | 1,41E-08   | 622.669  | pfam09135 | Alb1                              |          |        |
| 22351    | 1,75E-02   | 457.235  | cl28542   | BUR6 superfamily                  |          |        |
| 38581    | 7,50E+00   | 366.498  | pfam05730 | CFEM                              | secreted |        |
| 48520    | 1,34E-07   | 58.49    | pfam10235 | Cript                             |          |        |
| 299214   |            |          |           | ND**                              |          | 2TM i  |
| 345516   | 2,12E-31   | 128.082  | cl00224   | PLPDE_IV superfamily              |          |        |
| 362931   | 8,53E+00   | 435.598  | cl23766   | Zn2Cys6 transcriptional regulator |          |        |
| 1040237  | 0.00757436 | 362.919  | cl26247   | DNA_pol3_delta2 superfamily       |          |        |
| 1187332  |            |          |           | ND**                              |          | 1 TM o |
| 1296664  | 2,73E-15   | 774.238  | cd00204   | ANK                               |          |        |
| 1304722  | 3,02E-31   | 120.566  | cd00204   | ANK                               |          |        |
| 1321854  | 4,76E-22   | 105.745  | cd00306   | Peptidases_S8_S53                 |          |        |
| 1323003  | 3,85E-25   | 102.621  | pfam04568 | IATP                              |          |        |
| 1328464  | 1,68E-25   | 104.773  | cd00204   | ANK                               |          |        |
| 1331520  | 6,21E-17   | 796.646  | pfam11034 | Grg1                              |          |        |

|         |           |         |            |                                   |          |       |
|---------|-----------|---------|------------|-----------------------------------|----------|-------|
| 1333087 | 3,06E-50  | 181.628 | cl16912    | MDR superfamily                   |          |       |
| 1337649 | 5,70E-09  | 594.673 | pfam06825  | HSBP1                             |          |       |
| 1338738 | 4,86E+00  | 446.121 | cd06174    | MFS                               |          | 8TM i |
| 1339497 | 1,14E-13  | 797.068 | pfam11905  | DUF3425                           |          |       |
| 1342261 | 8,51E-03  | 547.581 | cd12148    | Zn2Cys6 transcriptional regulator |          |       |
| 1344902 | 1,27E-19  | 903.629 | cl14632    | VOC superfamily                   |          |       |
| 1347255 | 5,29E-04  | 515.918 | smart00066 | Zn2Cys6 transcriptional regulator |          |       |
| 1367383 | 9,96E-01  | 420.845 | pfam12937  | F-box-like                        |          |       |
| 1375601 | 5,26E-09  | 606.562 | pfam05347  | Complex1_LYR                      |          |       |
| 1376707 | 4,11E-10  | 705.306 | pfam13847  | Methyltransf_31                   |          |       |
| 1378765 | 3,21E-01  | 477.048 | cl00459    | MIT_CorA-like superfamily         |          | 2TM o |
| 1390335 | 5,38E-06  | 553.099 | cl21453    | PKc_like superfamily              |          |       |
| 1395561 | 1,65E-21  | 999.159 | cl16912    | MDR superfamily                   |          |       |
| 1397290 | 3,24E-24  | 977.059 | cd04457    | S1_S28E                           |          |       |
| 1397814 | 2,91E-05  | 558.038 | cd14688    | bZIP_YAP                          |          |       |
| 1398588 |           |         |            | ND**                              |          | 1TM o |
| 1398848 | 8,23E-03  | 492.654 | cd06661    | GGCT_like                         |          |       |
| 1399326 | 2,45E-20  | 875.942 | pfam05365  | UCR_UQCRX_QCR9                    |          |       |
| 1401724 | 1,22E-32  | 126.098 | pfam08651  | DASH_Duo1                         |          |       |
| 1404215 | 2,15E-08  | 638.233 | cl02518    | BTB superfamily                   |          |       |
| 1418460 | 8,73E-123 | 363.447 | PRK08259   | PRK08259                          |          |       |
| 1424428 |           |         |            | ND**                              | secreted |       |
| 1426776 | 4,95E-03  | 470.491 | cl01553    | GFA superfamily                   |          |       |
| 1431211 | 3,04E-30  | 128.207 | COG0596    | MhpC                              |          |       |
| 1437539 |           |         |            | ND**                              | secreted |       |
| 1439387 |           |         |            | ND**                              |          | 2TM i |
| 1440742 |           |         |            | ND**                              | secreted |       |
| 1448718 | 6,66E-01  | 432.029 | cl13276    | DUF3328 superfamily               |          |       |
| 1461835 | 1,13E-46  | 160.53  | pfam14832  | Tautomerase_3                     |          |       |
| 1463224 | 1,39E-17  | 923.659 | cl25409    | SDR superfamily                   |          |       |
| 1464596 | 9,77E-15  | 822.849 | cl21454    | NADB_Rossmann superfamily         |          |       |
| 1466625 | 1,07E-22  | 942.688 | pfam08991  | MTCP1                             |          |       |
| 1473118 | 1,64E-64  | 214.321 | cl27753    | adh_short superfamily             |          |       |

\* TM, transmembrane helices; o and i point to the location of the N-terminus (outside or inside the cell, respectively);

\*\*ND, no conserved domain detected

#### References:

Kuhls K, Lieckfeldt E, Borner T & Gueho E (1999) Molecular reidentification of human pathogenic *Trichoderma* isolates as *Trichoderma longibrachiatum* and *Trichoderma citrinoviride*. *Med Mycol* **37**: 25-33.

Kulkarni RD, Kelkar HS & Dean RA (2003) An eight-cysteine-containing CFEM domain unique to a group of fungal membrane proteins. *Trends Biochem Sci* **28**: 118-121.
