# Supplementary material for: Evolution and comparative genomics of the most common Trichoderma species
Source: PubMed Central journal article supplement (PMC6560777; doi:10.1186/s12864-019-5680-7), 2019-06-12
Supplement: 12864_2019_5680_MOESM12_ESM.pdf [file 12864_2019_5680_MOESM12_ESM.pdf]

## Trichoderma genes involved in sensing of the mating partner

Sensing of a potential mating partner is a prerequisite for sexual reproduction, and is fulfilled by a pheromone system consisting of peptide pheromone precursors and pheromone receptors (Nieuwenhuis & Aanen, 2012). Genome analysis shows that all 12 *Trichoderma* spp. have genes encoding the  $\alpha$ -type peptide pheromone precursor PPG1, which is comparable to its homolog in other fungi.

|                     | <i>T. reesei</i> | <i>T. longibrachiatum</i> | <i>T. citrinoviride</i> | <i>T. parareesei</i> | <i>T. harzianum</i> | <i>T. guizhouense</i> | <i>T. afroharzianum</i> | <i>T. virens</i> | <i>T. atroviride</i> | <i>T. gamsii</i> | <i>T. asperellum</i> | <i>T. hamatum</i> |
|---------------------|------------------|---------------------------|-------------------------|----------------------|---------------------|-----------------------|-------------------------|------------------|----------------------|------------------|----------------------|-------------------|
| PPG1, $\alpha$ type | 104292           | 317925                    | 1198762                 | OTA03422             | 86570               | OPB47026              | 1241                    | 44505            | 297240               | 18666200         | 144740               | 4957              |
| HPP1                | 34493            | 1420161                   | 1128304                 | *                    | 463451              | OPB39925              | 830                     | 91991            | *                    | *                | *                    | *                 |
| STE2 = HPR2         | 64018            | 29766                     | 1115433                 | OTA07042             | 96494               | OPB41683              | 4616                    | 21417            | 17079,36032          | 18661910         | 44057                | 7747              |
| STE3 = HPR1         | 57526            | 1322746                   | 1207301                 | OTA04631             | 107686              | OPB39349              | 6116                    | 39157            | 147894               | 18660796         | 127205               | 1425              |

\* no annotation, gene presence confirmed by translation of nt sequences

In contrast, *Trichoderma* does not contain orthologs of the **a**-type peptide pheromone precursors, but instead has h-type precursors (HPP1), which share characteristics of **a**- and  $\alpha$ -types by containing the consensus motif (LI)GC(TS)VM (Schmoll *et al.*, 2010). Interestingly, the HPP1 orthologs of members of ST are shorter because they contain only 1 or 2 copies of the consensus motif: In addition, all *Trichoderma* spp. contain the respective peptide pheromone precursors bind to pheromone receptors HPR1 (*ste3*) and HPR2 (*ste2*), which typical for heterothallic ascomycetes, all *Trichoderma* spp. have one MAT1-1 associated STE2p-type peptide pheromone receptor (HPR2), and one MAT1-2 associated STE3p-type peptide pheromone receptor (HPTR1).

```

T. atroviride MASEGVQSFSAVQARK-----GQSPQNSP--ATSQ-----FIGYLGCTIM
T. gamsii MS--GPGLLPPTTS-----GCTVQAKP--KPQQ-----SVRTH---YVGFMGCTVM
T. asperellum MARSAQTVMTKPOGKPOYIGYLGCTVMAKPODKPOG-----KPQ---YIGYLGCTVM
T. hamatum MARPSPASRPAQPTKGGYVGYLGCTVMAKPOKDGLGWTNSDCTVMAKPAKGGYVGYLGCTVM
  
```

Sequence of the HPP1 proteins from *Trichoderma* spp. of ST. The conserved YVGYLGCTVM motif is underlined.

## References

- Nieuwenhuis BPS & Aanen DK (2012) Sexual selection in fungi. *J Evolution Biol* **25**: 2397-2411.  
 Schmoll M, Seibel C, Tisch D, Dorrer M & Kubicek CP (2010) A novel class of peptide pheromone precursors in ascomycetous fungi. *Mol Microbiol* **77**: 1483-1501.
