# Supplementary material for: Evolution and comparative genomics of the most common Trichoderma species
Source: PubMed Central journal article supplement (PMC6560777; doi:10.1186/s12864-019-5680-7), 2019-06-12
Supplement: 12864_2019_5680_MOESM18_ESM.pdf [file 12864_2019_5680_MOESM18_ESM.pdf]

## Small cysteine-rich secreted effector proteins

### Contents

|                                                                    |    |
|--------------------------------------------------------------------|----|
| Small cysteine-rich secreted effector proteins .....               | 1  |
| The list of SSCPs in <i>Trichoderma</i> (SP – signal peptide)..... | 2  |
| References.....                                                    | 21 |

To identify SSCPs, we screened the genomes of the 12 *Trichoderma* spp. for proteins that contained a signal peptide, were less than 300 amino acids long and in which cysteine residues made up for at least 5 % of all amino acids. The latter value was chosen from the fact that the proteome of the 12 species exhibited an average cysteine content of  $1.43 \pm 0.37$  %, and we considered a roughly threefold increase over this value content as “cysteine rich”. The number of so detected SSCPs is shown below and Table 7, with *T. asperellum* containing 125 and *T. parareesei* only containing 27. It is also striking that – in contrast to other protein groups - their number showed no clade specific pattern, and the variation was species-specific. This is also corroborated by the finding of only 21 SSCPs in the core genome. Irrespective of this, the number of SSCPs in *Trichoderma* is considerably smaller than that found in other fungal genomes (Stergiopoulos & de Wit, 2009).

Hydrophobins are small (6-8 kDa), secreted proteins that are characterized by a specific arrangement of 8 cysteine residues (C1 – C8), and which possess the ability to alter the hydrophobicity/hydrophilicity of surfaces. Dependent on the spacing of C4 and C5 and their solubility, they are usually grouped into two classes (Wosten, 2001, Linder *et al.*, 2005). *Trichoderma* is very rich in hydrophobins, ranging from 7 in species from section *Longibrachiatum* to 16 in *T. atroviride* of section *Trichoderma*. Thirteen of them can be categorized as class II hydrophobins (Kubicek *et al.*, 2008), of which 6 are present in the core genome (see Additional File 9). They include orthologues of *T. reesei* HFB1 - HFB5 (Kubicek *et al.*, 2008), and a larger (>12 kDa) hydrophobin that has so far not been detected. Interestingly, the latter contains an N-terminal, cysteine-rich domain and a C-terminal domain consisting to 50 % of A, P, S and T, which flank the hydrophobin domain which – untypically for class II hydrophobins – contains a very short (6 aa) helix. This hydrophobin is strongly conserved also within most Sordariomycetes, suggesting that it may serve an important yet unknown function.

Four class II HFBs are specifically found only in species from section *Trichoderma*, and three exclusively in species of HV. In addition, the sections *Longibrachiatum* and HV share the presence of a class II HFB with a long, P/G-rich N-terminus which has in *T. reesei* been named HFB6 (Kubicek *et al.*, 2008).

*Trichoderma* does not contain class I hydrophobins. Instead, species of HV and ST contain three hydrophobins that belong to a recently defined subclass with properties of both classes I and II (Seidl-Seiboth *et al.*, 2011). In the latter paper, two such genes were also reported to occur in *T. longibrachiatum*, but we could not find any of them in its genome. The sequences used in (Seidl-Seiboth *et al.*, 2011) were obtained by translated of ESTs from a *bone-fide* *T. longibrachiatum* strain (Vizcaino *et al.*, 2007). We have therefore analysed

several other ESTs of this strain by blastx, and the best hits were always obtained with *T. virens* instead of species from the SL. We therefore believe that the EST used in the above paper is in fact not from *T. longibrachiatum*, and this new subclass is in view of our results therefore absent from SL.

Cerato-platanin proteins are also fungal-specific, small and secreted proteins but contain only four conserved cysteines, and are believed to be important for interaction with other organisms (Gaderer *et al.*, 2014) and eliciting defense reactions in plants (Djonovic *et al.*, 2006, Gaderer *et al.*, 2015). *Trichoderma* contains three of these proteins (EPL1, EPL2, EPL3), for which orthologs are present in each species.

#### The list of SSCPs in *Trichoderma* (SP – signal peptide)

| Taxon                   | Accession number | SSCPs | SP length | score |
|-------------------------|------------------|-------|-----------|-------|
| <i>T. afroharzianum</i> |                  | 66    |           |       |
|                         | KKO96486         |       | 15        | 0.834 |
|                         | KKO96498         |       | 19        | 0.811 |
|                         | KKO96855         |       | 21        | 0.847 |
|                         | KKO96914         |       | 19        | 0.894 |
|                         | KKO97159         |       | 23        | 0.698 |
|                         | KKO97203         |       | 18        | 0.907 |
|                         | KKO97206         |       | 16        | 0.875 |
|                         | KKO98188         |       | 19        | 0.525 |
|                         | KKO98216         |       | 19        | 0.869 |
|                         | KKO98316         |       | 18        | 0.751 |
|                         | KKO98661         |       | 23        | 0.784 |
|                         | KKO98965         |       | 20        | 0.811 |
|                         | KKO98980         |       | 16        | 0.868 |
|                         | KKO98988         |       | 20        | 0.849 |
|                         | KKO99034         |       | 18        | 0.829 |
|                         | KKO99268         |       | 18        | 0.707 |
|                         | KKO99269         |       | 19        | 0.889 |
|                         | KKO99411         |       | 16        | 0.818 |
|                         | KKO99621         |       | 24        | 0.681 |
|                         | KKO99642         |       | 16        | 0.837 |
|                         | KKO99647         |       | 20        | 0.743 |
|                         | KKO99806         |       | 16        | 0.729 |
|                         | KKP00012         |       | 20        | 0.776 |
|                         | KKP00107         |       | 18        | 0.86  |
|                         | KKP00119         |       | 20        | 0.798 |
|                         | KKP00132         |       | 20        | 0.804 |
|                         | KKP00290         |       | 21        | 0.526 |
|                         | KKP00321         |       | 20        | 0.942 |
|                         | KKP00430         |       | 16        | 0.702 |
|                         | KKP00438         |       | 20        | 0.719 |
|                         | KKP00601         |       | 19        | 0.596 |

|                             |          |           |    |       |
|-----------------------------|----------|-----------|----|-------|
|                             | KKP00624 |           | 18 | 0.842 |
|                             | KKP00947 |           | 21 | 0.706 |
|                             | KKP01427 |           | 16 | 0.786 |
|                             | KKP01472 |           | 18 | 0.713 |
|                             | KKP02296 |           | 18 | 0.748 |
|                             | KKP02655 |           | 20 | 0.883 |
|                             | KKP02884 |           | 21 | 0.84  |
|                             | KKP03014 |           | 17 | 0.784 |
|                             | KKP03205 |           | 19 | 0.728 |
|                             | KKP03432 |           | 15 | 0.851 |
|                             | KKP03437 |           | 23 | 0.82  |
|                             | KKP03524 |           | 18 | 0.84  |
|                             | KKP03527 |           | 20 | 0.626 |
|                             | KKP03550 |           | 24 | 0.699 |
|                             | KKP03759 |           | 17 | 0.785 |
|                             | KKP03914 |           | 16 | 0.808 |
|                             | KKP04275 |           | 18 | 0.812 |
|                             | KKP04312 |           | 20 | 0.858 |
|                             | KKP04674 |           | 16 | 0.709 |
|                             | KKP04739 |           | 20 | 0.947 |
|                             | KKP04958 |           | 17 | 0.542 |
|                             | KKP05074 |           | 20 | 0.767 |
|                             | KKP05132 |           | 19 | 0.84  |
|                             | KKP05145 |           | 17 | 0.706 |
|                             | KKP05664 |           | 20 | 0.683 |
|                             | KKP05851 |           | 19 | 0.82  |
|                             | KKP06130 |           | 19 | 0.766 |
|                             | KKP06303 |           | 16 | 0.642 |
|                             | KKP06401 |           | 16 | 0.824 |
|                             | KKP06584 |           | 19 | 0.812 |
|                             | KKP06880 |           | 17 | 0.889 |
|                             | KKP06986 |           | 20 | 0.867 |
|                             | KKP07389 |           | 26 | 0.689 |
|                             | KKP07456 |           | 16 | 0.834 |
|                             | KKP07499 |           | 22 | 0.718 |
| <b><i>T. atroviride</i></b> |          | <b>75</b> |    |       |
|                             | 314699   |           | 16 | 0.847 |
|                             | 28723    |           | 18 | 0.842 |
|                             | 28931    |           | 22 | 0.720 |
|                             | 30929    |           | 17 | 0.765 |
|                             | 32713    |           | 21 | 0.890 |
|                             | 32903    |           | 19 | 0.761 |
|                             | 35461    |           | 20 | 0.948 |

|  |        |  |    |       |
|--|--------|--|----|-------|
|  | 40838  |  | 21 | 0.827 |
|  | 42766  |  | 15 | 0.730 |
|  | 45244  |  | 18 | 0.742 |
|  | 45489  |  | 16 | 0.884 |
|  | 46849  |  | 18 | 0.781 |
|  | 48461  |  | 19 | 0.753 |
|  | 48890  |  | 20 | 0.709 |
|  | 50405  |  | 17 | 0.885 |
|  | 55116  |  | 16 | 0.847 |
|  | 77418  |  | 18 | 0.682 |
|  | 77489  |  | 16 | 0.806 |
|  | 82345  |  | 15 | 0.871 |
|  | 84221  |  | 19 | 0.518 |
|  | 84995  |  | 18 | 0.818 |
|  | 85197  |  | 23 | 0.548 |
|  | 85327  |  | 16 | 0.478 |
|  | 86583  |  | 19 | 0.824 |
|  | 87502  |  | 20 | 0.818 |
|  | 89743  |  | 19 | 0.821 |
|  | 89816  |  | 20 | 0.784 |
|  | 90157  |  | 19 | 0.688 |
|  | 90673  |  | 18 | 0.861 |
|  | 91362  |  | 21 | 0.773 |
|  | 94066  |  | 19 | 0.652 |
|  | 94099  |  | 17 | 0.734 |
|  | 138574 |  | 20 | 0.604 |
|  | 146062 |  | 19 | 0.746 |
|  | 171091 |  | 14 | 0.452 |
|  | 212005 |  | 18 | 0.663 |
|  | 214851 |  | 17 | 0.702 |
|  | 219909 |  | 23 | 0.468 |
|  | 224623 |  | 19 | 0.707 |
|  | 231060 |  | 20 | 0.840 |
|  | 254731 |  | 21 | 0.848 |
|  | 255048 |  | 22 | 0.720 |
|  | 256070 |  | 17 | 0.517 |
|  | 256403 |  | 16 | 0.784 |
|  | 256835 |  | 15 | 0.754 |
|  | 258206 |  | 16 | 0.723 |
|  | 258295 |  | 15 | 0.787 |
|  | 259618 |  | 21 | 0.658 |
|  | 259624 |  | 21 | 0.477 |
|  | 271339 |  | 20 | 0.777 |

|                         |              |           |    |       |
|-------------------------|--------------|-----------|----|-------|
|                         | 281086       |           | 22 | 0.748 |
|                         | 297515       |           | 17 | 0.658 |
|                         | 297727       |           | 27 | 0.481 |
|                         | 297979       |           | 21 | 0.711 |
|                         | 298185       |           | 35 | 0.552 |
|                         | 298319       |           | 34 | 0.485 |
|                         | 299222       |           | 18 | 0.525 |
|                         | 299224       |           | 19 | 0.802 |
|                         | 299543       |           | 16 | 0.782 |
|                         | 300373       |           | 21 | 0.506 |
|                         | 300654       |           | 19 | 0.598 |
|                         | 300702       |           | 18 | 0.879 |
|                         | 300903       |           | 16 | 0.592 |
|                         | 301270       |           | 16 | 0.815 |
|                         | 302423       |           | 19 | 0.871 |
|                         | 302587       |           | 16 | 0.809 |
|                         | 302682       |           | 18 | 0.510 |
|                         | 303083       |           | 21 | 0.709 |
|                         | 304287       |           | 15 | 0.472 |
|                         | 305231       |           | 19 | 0.749 |
|                         | 306761       |           | 16 | 0.867 |
|                         | 310262       |           | 20 | 0.748 |
|                         | 310562       |           | 15 | 0.826 |
|                         | 322584       |           | 15 | 0.838 |
|                         | 323147       |           | 20 | 0.849 |
| <b><i>T. gamsii</i></b> |              | <b>42</b> |    |       |
|                         | XP_018657641 |           | 21 | 0.693 |
|                         | XP_018663666 |           | 19 | 0.687 |
|                         | XP_018663627 |           | 26 | 0.783 |
|                         | XP_018663607 |           | 15 | 0.818 |
|                         | XP_018656268 |           | 20 | 0.948 |
|                         | XP_018660026 |           | 18 | 0.874 |
|                         | XP_018661344 |           | 19 | 0.541 |
|                         | XP_018657678 |           | 17 | 0.823 |
|                         | XP_018657659 |           | 20 | 0.714 |
|                         | XP_018662057 |           | 18 | 0.567 |
|                         | XP_018666430 |           | 20 | 0.708 |
|                         | XP_018666449 |           | 19 | 0.824 |
|                         | XP_018666534 |           | 19 | 0.801 |
|                         | XP_018661955 |           | 20 | 0.815 |
|                         | XP_018661943 |           | 19 | 0.571 |
|                         | XP_018664531 |           | 20 | 0.867 |
|                         | XP_018656117 |           | 19 | 0.792 |

|                              |              |           |    |       |
|------------------------------|--------------|-----------|----|-------|
|                              | XP_018656118 |           | 20 | 0.803 |
|                              | XP_018662733 |           | 21 | 0.773 |
|                              | XP_018665576 |           | 19 | 0.760 |
|                              | XP_018660790 |           | 18 | 0.835 |
|                              | XP_018662912 |           | 15 | 0.679 |
|                              | XP_018666007 |           | 19 | 0.846 |
|                              | XP_018665139 |           | 19 | 0.761 |
|                              | XP_018665166 |           | 19 | 0.750 |
|                              | XP_018658201 |           | 21 | 0.759 |
|                              | XP_018658242 |           | 16 | 0.914 |
|                              | XP_018655748 |           | 17 | 0.848 |
|                              | XP_018658076 |           | 21 | 0.813 |
|                              | XP_018663406 |           | 17 | 0.633 |
|                              | XP_018663333 |           | 18 | 0.655 |
|                              | XP_018665857 |           | 16 | 0.868 |
|                              | XP_018664132 |           | 17 | 0.874 |
|                              | XP_018664130 |           | 17 | 0.862 |
|                              | XP_018665054 |           | 16 | 0.763 |
|                              | XP_018665041 |           | 23 | 0.756 |
|                              | XP_018662424 |           | 20 | 0.784 |
|                              | XP_018663141 |           | 17 | 0.721 |
|                              | XP_018658788 |           | 17 | 0.785 |
|                              | XP_018661493 |           | 15 | 0.783 |
|                              | XP_018657555 |           | 23 | 0.659 |
|                              | XP_018657347 |           | 19 | 0.610 |
|                              | XP_018658877 |           | 19 | 0.726 |
|                              | XP_018658836 |           | 19 | 0.868 |
|                              | XP_018658393 |           | 15 | 0.826 |
|                              | XP_018659872 |           | 21 | 0.806 |
|                              | XP_018659426 |           | 16 | 0.811 |
|                              | XP_018665698 |           | 19 | 0.821 |
|                              | XP_018665700 |           | 18 | 0.886 |
|                              | XP_018666205 |           | 15 | 0.675 |
|                              | XP_018657023 |           | 20 | 0.769 |
|                              | XP_018655736 |           | 21 | 0.701 |
| <b><i>T. guizhouense</i></b> |              | <b>44</b> |    |       |
|                              | OPB44820     |           | 17 | 0.889 |
|                              | OPB36613     |           | 20 | 0.942 |
|                              | OPB37186     |           | 16 | 0.913 |
|                              | OPB37502     |           | 18 | 0.876 |
|                              | OPB37525     |           | 21 | 0.738 |
|                              | OPB37603     |           | 16 | 0.839 |
|                              | OPB37634     |           | 18 | 0.663 |
|                              | OPB38530     |           | 16 | 0.773 |
|                              | OPB38637     |           | 18 | 0.843 |

|                            |          |            |    |       |
|----------------------------|----------|------------|----|-------|
|                            | OPB38772 |            | 19 | 0.859 |
|                            | OPB38899 |            | 18 | 0.748 |
|                            | OPB38900 |            | 18 | 0.839 |
|                            | OPB39042 |            | 19 | 0.836 |
|                            | OPB39052 |            | 19 | 0.596 |
|                            | OPB39529 |            | 19 | 0.847 |
|                            | OPB40230 |            | 20 | 0.878 |
|                            | OPB40410 |            | 16 | 0.835 |
|                            | OPB40452 |            | 22 | 0.723 |
|                            | OPB40515 |            | 18 | 0.793 |
|                            | OPB40661 |            | 16 | 0.852 |
|                            | OPB40679 |            | 19 | 0.827 |
|                            | OPB40918 |            | 17 | 0.784 |
|                            | OPB41939 |            | 19 | 0.812 |
|                            | OPB42521 |            | 20 | 0.792 |
|                            | OPB42647 |            | 17 | 0.720 |
|                            | OPB43857 |            | 15 | 0.813 |
|                            | OPB43872 |            | 20 | 0.680 |
|                            | OPB44008 |            | 19 | 0.822 |
|                            | OPB44528 |            | 18 | 0.780 |
|                            | OPB44600 |            | 16 | 0.812 |
|                            | OPB44696 |            | 16 | 0.867 |
|                            | OPB46132 |            | 16 | 0.890 |
|                            | OPB46673 |            | 23 | 0.686 |
|                            | OPB41390 |            | 17 | 0.557 |
|                            | OPB41244 |            | 23 | 0.726 |
|                            | OPB44951 |            | 15 | 0.861 |
|                            | OPB39663 |            | 18 | 0.748 |
|                            | OPB43682 |            | 20 | 0.819 |
|                            | OPB37929 |            | 18 | 0.795 |
|                            | OPB41745 |            | 24 | 0.708 |
|                            | OPB36274 |            | 20 | 0.847 |
|                            | OPB36111 |            | 16 | 0.702 |
|                            | OPB36040 |            | 20 | 0.705 |
|                            | OPB35941 |            | 19 | 0.681 |
| <b><i>T. harzianum</i></b> |          | <b>113</b> |    |       |
|                            | 132934   |            | 18 | 0.867 |
|                            | 195      |            | 20 | 0.840 |
|                            | 247      |            | 18 | 0.700 |
|                            | 1760     |            | 19 | 0.596 |
|                            | 1820     |            | 20 | 0.775 |
|                            | 3176     |            | 21 | 0.736 |
|                            | 5619     |            | 20 | 0.729 |
|                            | 7726     |            | 15 | 0.918 |

|  |        |  |    |       |
|--|--------|--|----|-------|
|  | 10061  |  | 21 | 0.793 |
|  | 10849  |  | 19 | 0.889 |
|  | 10918  |  | 16 | 0.784 |
|  | 11493  |  | 20 | 0.838 |
|  | 14808  |  | 16 | 0.777 |
|  | 19060  |  | 17 | 0.466 |
|  | 72403  |  | 18 | 0.852 |
|  | 74377  |  | 21 | 0.743 |
|  | 76763  |  | 16 | 0.817 |
|  | 79424  |  | 16 | 0.913 |
|  | 79555  |  | 18 | 0.871 |
|  | 82972  |  | 20 | 0.950 |
|  | 83008  |  | 19 | 0.847 |
|  | 86900  |  | 16 | 0.858 |
|  | 87195  |  | 23 | 0.638 |
|  | 89031  |  | 19 | 0.772 |
|  | 89146  |  | 16 | 0.855 |
|  | 89933  |  | 20 | 0.865 |
|  | 93744  |  | 18 | 0.783 |
|  | 94876  |  | 16 | 0.832 |
|  | 97657  |  | 17 | 0.770 |
|  | 98114  |  | 18 | 0.783 |
|  | 98997  |  | 19 | 0.800 |
|  | 99275  |  | 16 | 0.782 |
|  | 102121 |  | 22 | 0.641 |
|  | 134143 |  | 19 | 0.801 |
|  | 142486 |  | 20 | 0.680 |
|  | 144956 |  | 16 | 0.832 |
|  | 147959 |  | 16 | 0.847 |
|  | 152397 |  | 23 | 0.637 |
|  | 157431 |  | 19 | 0.850 |
|  | 170055 |  | 16 | 0.702 |
|  | 198819 |  | 31 | 0.784 |
|  | 212147 |  | 17 | 0.537 |
|  | 231529 |  | 25 | 0.550 |
|  | 234055 |  | 19 | 0.507 |
|  | 234588 |  | 17 | 0.450 |
|  | 244374 |  | 19 | 0.757 |
|  | 244717 |  | 21 | 0.579 |
|  | 314749 |  | 17 | 0.527 |
|  | 327585 |  | 21 | 0.753 |
|  | 372941 |  | 23 | 0.656 |
|  | 373844 |  | 27 | 0.511 |



|  |        |  |    |       |
|--|--------|--|----|-------|
|  | 389440 |  | 17 | 0.485 |
|  | 394493 |  | 28 | 0.486 |
|  | 415456 |  | 20 | 0.682 |
|  | 416142 |  | 27 | 0.702 |
|  | 426066 |  | 19 | 0.830 |
|  | 433808 |  | 21 | 0.524 |
|  | 443708 |  | 18 | 0.525 |
|  | 451526 |  | 21 | 0.595 |
|  | 476937 |  | 16 | 0.816 |
|  | 478239 |  | 24 | 0.644 |
|  | 479033 |  | 20 | 0.700 |
|  | 480242 |  | 23 | 0.558 |
|  | 481706 |  | 28 | 0.609 |
|  | 485265 |  | 20 | 0.613 |
|  | 488463 |  | 20 | 0.842 |
|  | 489366 |  | 16 | 0.852 |
|  | 492015 |  | 17 | 0.827 |
|  | 492105 |  | 17 | 0.844 |
|  | 493416 |  | 17 | 0.907 |
|  | 495727 |  | 17 | 0.776 |
|  | 496184 |  | 20 | 0.838 |
|  | 496231 |  | 23 | 0.831 |
|  | 496268 |  | 23 | 0.689 |
|  | 497684 |  | 19 | 0.748 |
|  | 498376 |  | 14 | 0.703 |
|  | 499123 |  | 16 | 0.868 |
|  | 501444 |  | 18 | 0.687 |
|  | 502416 |  | 19 | 0.850 |
|  | 502599 |  | 17 | 0.557 |
|  | 502685 |  | 16 | 0.700 |
|  | 503468 |  | 16 | 0.834 |
|  | 503784 |  | 32 | 0.750 |
|  | 504228 |  | 24 | 0.580 |
|  | 504679 |  | 19 | 0.833 |
|  | 505024 |  | 24 | 0.626 |
|  | 505052 |  | 17 | 0.919 |
|  | 505375 |  | 21 | 0.782 |
|  | 505665 |  | 24 | 0.479 |
|  | 505679 |  | 20 | 0.777 |
|  | 505981 |  | 19 | 0.857 |
|  | 506080 |  | 24 | 0.736 |
|  | 507026 |  | 22 | 0.661 |
|  | 508128 |  | 21 | 0.925 |

|                                  |         |           |    |       |
|----------------------------------|---------|-----------|----|-------|
|                                  | 508663  |           | 18 | 0.823 |
|                                  | 508974  |           | 19 | 0.714 |
|                                  | 509631  |           | 21 | 0.668 |
|                                  | 510010  |           | 19 | 0.560 |
|                                  | 510508  |           | 20 | 0.776 |
|                                  | 511478  |           | 17 | 0.890 |
|                                  | 512173  |           | 18 | 0.746 |
|                                  | 512550  |           | 19 | 0.601 |
|                                  | 512586  |           | 24 | 0.691 |
|                                  | 514362  |           | 18 | 0.786 |
|                                  | 519288  |           | 30 | 0.490 |
|                                  | 519857  |           | 19 | 0.710 |
|                                  | 523481  |           | 18 | 0.669 |
|                                  | 525011  |           | 17 | 0.718 |
|                                  | 530682  |           | 15 | 0.813 |
|                                  | 533861  |           | 18 | 0.758 |
|                                  | 535541  |           | 18 | 0.784 |
|                                  | 539293  |           | 31 | 0.526 |
|                                  | 544145  |           | 24 | 0.908 |
| <b><i>T. longibrachiatum</i></b> |         | <b>89</b> |    |       |
|                                  | 1402025 |           | 16 | 0.885 |
|                                  | 8542    |           | 16 | 0.830 |
|                                  | 38581   |           | 11 | 0.639 |
|                                  | 75082   |           | 26 | 0.534 |
|                                  | 80155   |           | 46 | 0.535 |
|                                  | 91205   |           | 17 | 0.722 |
|                                  | 96360   |           | 23 | 0.665 |
|                                  | 154710  |           | 19 | 0.643 |
|                                  | 158578  |           | 22 | 0.630 |
|                                  | 172014  |           | 21 | 0.568 |
|                                  | 201078  |           | 26 | 0.538 |
|                                  | 223269  |           | 29 | 0.574 |
|                                  | 238281  |           | 23 | 0.517 |
|                                  | 244812  |           | 25 | 0.482 |
|                                  | 300564  |           | 25 | 0.609 |
|                                  | 329082  |           | 21 | 0.652 |
|                                  | 334975  |           | 18 | 0.562 |
|                                  | 341074  |           | 33 | 0.549 |
|                                  | 346097  |           | 17 | 0.858 |
|                                  | 361622  |           | 26 | 0.527 |
|                                  | 1006893 |           | 18 | 0.818 |
|                                  | 1028342 |           | 19 | 0.669 |
|                                  | 1047641 |           | 16 | 0.833 |

|  |         |  |    |       |
|--|---------|--|----|-------|
|  | 1058805 |  | 17 | 0.565 |
|  | 1062690 |  | 26 | 0.683 |
|  | 1063970 |  | 21 | 0.656 |
|  | 1070379 |  | 24 | 0.546 |
|  | 1086601 |  | 28 | 0.601 |
|  | 1110868 |  | 19 | 0.524 |
|  | 1136070 |  | 21 | 0.529 |
|  | 1150927 |  | 19 | 0.889 |
|  | 1154811 |  | 22 | 0.636 |
|  | 1183905 |  | 26 | 0.698 |
|  | 1187726 |  | 18 | 0.641 |
|  | 1191645 |  | 23 | 0.628 |
|  | 1266014 |  | 21 | 0.509 |
|  | 1321471 |  | 17 | 0.786 |
|  | 1328082 |  | 16 | 0.613 |
|  | 1334050 |  | 16 | 0.794 |
|  | 1340025 |  | 18 | 0.753 |
|  | 1341182 |  | 17 | 0.841 |
|  | 1342360 |  | 17 | 0.864 |
|  | 1347716 |  | 16 | 0.799 |
|  | 1356080 |  | 16 | 0.786 |
|  | 1357105 |  | 19 | 0.746 |
|  | 1373787 |  | 16 | 0.740 |
|  | 1378939 |  | 19 | 0.742 |
|  | 1392226 |  | 25 | 0.499 |
|  | 1393193 |  | 16 | 0.903 |
|  | 1394941 |  | 18 | 0.633 |
|  | 1396680 |  | 22 | 0.675 |
|  | 1397045 |  | 19 | 0.835 |
|  | 1397521 |  | 15 | 0.854 |
|  | 1397785 |  | 23 | 0.774 |
|  | 1397796 |  | 20 | 0.726 |
|  | 1398368 |  | 19 | 0.522 |
|  | 1399398 |  | 19 | 0.705 |
|  | 1399466 |  | 28 | 0.606 |
|  | 1399735 |  | 17 | 0.803 |
|  | 1399879 |  | 16 | 0.795 |
|  | 1400006 |  | 23 | 0.639 |
|  | 1400891 |  | 21 | 0.875 |
|  | 1400902 |  | 26 | 0.781 |
|  | 1401130 |  | 22 | 0.886 |
|  | 1401407 |  | 16 | 0.867 |
|  | 1401525 |  | 18 | 0.955 |

|                         |         |           |    |       |
|-------------------------|---------|-----------|----|-------|
|                         | 1401645 |           | 17 | 0.827 |
|                         | 1401876 |           | 21 | 0.641 |
|                         | 1402256 |           | 19 | 0.476 |
|                         | 1402359 |           | 24 | 0.712 |
|                         | 1402572 |           | 20 | 0.717 |
|                         | 1404410 |           | 18 | 0.697 |
|                         | 1404415 |           | 18 | 0.723 |
|                         | 1404451 |           | 19 | 0.789 |
|                         | 1404595 |           | 19 | 0.712 |
|                         | 1404658 |           | 19 | 0.664 |
|                         | 1405283 |           | 21 | 0.918 |
|                         | 1405395 |           | 20 | 0.815 |
|                         | 1405397 |           | 29 | 0.581 |
|                         | 1405473 |           | 30 | 0.645 |
|                         | 1405997 |           | 30 | 0.484 |
|                         | 1421968 |           | 19 | 0.885 |
|                         | 1424428 |           | 21 | 0.705 |
|                         | 1426882 |           | 19 | 0.763 |
|                         | 1437539 |           | 17 | 0.827 |
|                         | 1439862 |           | 16 | 0.881 |
|                         | 1448530 |           | 25 | 0.665 |
|                         | 1460034 |           | 19 | 0.799 |
| <b><i>T. reesei</i></b> |         | <b>39</b> |    |       |
|                         | 109911  |           | 14 | 0.805 |
|                         | 50323   |           | 16 | 0.778 |
|                         | 54407   |           | 24 | 0.704 |
|                         | 66077   |           | 20 | 0.836 |
|                         | 70840   |           | 19 | 0.671 |
|                         | 73173   |           | 15 | 0.691 |
|                         | 79448   |           | 18 | 0.602 |
|                         | 103135  |           | 18 | 0.804 |
|                         | 103174  |           | 19 | 0.702 |
|                         | 103393  |           | 17 | 0.657 |
|                         | 104293  |           | 15 | 0.605 |
|                         | 104401  |           | 16 | 0.768 |
|                         | 105311  |           | 18 | 0.803 |
|                         | 105533  |           | 16 | 0.711 |
|                         | 106453  |           | 16 | 0.712 |
|                         | 106538  |           | 23 | 0.571 |
|                         | 106615  |           | 15 | 0.582 |
|                         | 106662  |           | 22 | 0.592 |
|                         | 107131  |           | 19 | 0.944 |
|                         | 107347  |           | 21 | 0.869 |

|                         |        |           |    |       |
|-------------------------|--------|-----------|----|-------|
|                         | 108663 |           | 21 | 0.594 |
|                         | 108684 |           | 18 | 0.609 |
|                         | 109231 |           | 19 | 0.648 |
|                         | 109253 |           | 19 | 0.693 |
|                         | 109255 |           | 18 | 0.730 |
|                         | 111205 |           | 16 | 0.718 |
|                         | 111495 |           | 15 | 0.707 |
|                         | 111499 |           | 18 | 0.748 |
|                         | 111915 |           | 16 | 0.876 |
|                         | 112037 |           | 15 | 0.785 |
|                         | 119989 |           | 14 | 0.754 |
|                         | 120479 |           | 17 | 0.953 |
|                         | 120697 |           | 17 | 0.786 |
|                         | 121135 |           | 14 | 0.748 |
|                         | 121177 |           | 18 | 0.835 |
|                         | 121739 |           | 18 | 0.743 |
|                         | 123236 |           | 20 | 0.745 |
|                         | 123967 |           | 15 | 0.786 |
|                         | 124295 |           | 18 | 0.910 |
| <b><i>T. virens</i></b> |        | <b>65</b> |    |       |
|                         | 91716  |           | 22 | 0.704 |
|                         | 19266  |           | 21 | 0.874 |
|                         | 19757  |           | 16 | 0.771 |
|                         | 27800  |           | 19 | 0.862 |
|                         | 29260  |           | 16 | 0.829 |
|                         | 31923  |           | 18 | 0.737 |
|                         | 32462  |           | 19 | 0.688 |
|                         | 32688  |           | 22 | 0.872 |
|                         | 38080  |           | 23 | 0.679 |
|                         | 48810  |           | 17 | 0.850 |
|                         | 49849  |           | 16 | 0.824 |
|                         | 51487  |           | 11 | 0.513 |
|                         | 53684  |           | 16 | 0.756 |
|                         | 55099  |           | 20 | 0.701 |
|                         | 57903  |           | 24 | 0.682 |
|                         | 58093  |           | 19 | 0.586 |
|                         | 58578  |           | 16 | 0.798 |
|                         | 58944  |           | 23 | 0.634 |
|                         | 60531  |           | 16 | 0.748 |
|                         | 61653  |           | 19 | 0.779 |
|                         | 62229  |           | 25 | 0.603 |
|                         | 65112  |           | 18 | 0.782 |
|                         | 66299  |           | 16 | 0.851 |

|                             |        |           |    |       |
|-----------------------------|--------|-----------|----|-------|
|                             | 66518  |           | 23 | 0.796 |
|                             | 68245  |           | 16 | 0.679 |
|                             | 68434  |           | 19 | 0.846 |
|                             | 69117  |           | 20 | 0.783 |
|                             | 70311  |           | 20 | 0.737 |
|                             | 72996  |           | 16 | 0.844 |
|                             | 79197  |           | 19 | 0.894 |
|                             | 80895  |           | 24 | 0.706 |
|                             | 83985  |           | 16 | 0.703 |
|                             | 84522  |           | 26 | 0.675 |
|                             | 87351  |           | 19 | 0.594 |
|                             | 91466  |           | 16 | 0.836 |
|                             | 92071  |           | 18 | 0.900 |
|                             | 92434  |           | 18 | 0.818 |
|                             | 92793  |           | 17 | 0.886 |
|                             | 93159  |           | 16 | 0.886 |
|                             | 110875 |           | 16 | 0.871 |
|                             | 111642 |           | 19 | 0.882 |
|                             | 111693 |           | 19 | 0.703 |
|                             | 111979 |           | 17 | 0.716 |
|                             | 121648 |           | 18 | 0.709 |
|                             | 139640 |           | 16 | 0.527 |
|                             | 140013 |           | 18 | 0.669 |
|                             | 143417 |           | 18 | 0.747 |
|                             | 151784 |           | 17 | 0.721 |
|                             | 153055 |           | 17 | 0.764 |
|                             | 181575 |           | 18 | 0.772 |
|                             | 199191 |           | 20 | 0.664 |
|                             | 203083 |           | 20 | 0.776 |
|                             | 214571 |           | 19 | 0.880 |
|                             | 215664 |           | 21 | 0.497 |
|                             | 216814 |           | 17 | 0.666 |
|                             | 216987 |           | 19 | 0.830 |
|                             | 218116 |           | 17 | 0.824 |
|                             | 220441 |           | 19 | 0.806 |
|                             | 220864 |           | 20 | 0.947 |
|                             | 222643 |           | 17 | 0.628 |
|                             | 222876 |           | 18 | 0.887 |
|                             | 223574 |           | 17 | 0.887 |
|                             | 223913 |           | 15 | 0.840 |
|                             | 224489 |           | 17 | 0.675 |
|                             | 225030 |           | 22 | 0.898 |
| <b><i>T. parareesei</i></b> |        | <b>29</b> |    |       |

|                                |          |           |    |       |
|--------------------------------|----------|-----------|----|-------|
|                                | OTA06008 |           | 17 | 0.836 |
|                                | OSZ99916 |           | 15 | 0.854 |
|                                | OTA00002 |           | 21 | 0.753 |
|                                | OTA00133 |           | 19 | 0.719 |
|                                | OTA00252 |           | 19 | 0.773 |
|                                | OTA00542 |           | 17 | 0.770 |
|                                | OTA00644 |           | 17 | 0.899 |
|                                | OTA00659 |           | 16 | 0.875 |
|                                | OTA01064 |           | 19 | 0.731 |
|                                | OTA01214 |           | 20 | 0.945 |
|                                | OTA02273 |           | 19 | 0.695 |
|                                | OTA02329 |           | 19 | 0.802 |
|                                | OTA02386 |           | 23 | 0.616 |
|                                | OTA02552 |           | 16 | 0.891 |
|                                | OTA02752 |           | 16 | 0.807 |
|                                | OTA03335 |           | 19 | 0.679 |
|                                | OTA03470 |           | 17 | 0.841 |
|                                | OTA03699 |           | 16 | 0.836 |
|                                | OTA04052 |           | 17 | 0.714 |
|                                | OTA04103 |           | 18 | 0.744 |
|                                | OTA04385 |           | 19 | 0.848 |
|                                | OTA04651 |           | 16 | 0.720 |
|                                | OTA04742 |           | 18 | 0.819 |
|                                | OTA05122 |           | 21 | 0.882 |
|                                | OTA05223 |           | 19 | 0.837 |
|                                | OTA05364 |           | 17 | 0.789 |
|                                | OTA05368 |           | 26 | 0.675 |
|                                | OTA05568 |           | 16 | 0.836 |
|                                | OTA07131 |           | 17 | 0.785 |
| <b><i>T. citrinoviride</i></b> |          | <b>50</b> |    |       |
|                                | 1100855  |           | 16 | 0.815 |
|                                | 5227     |           | 19 | 0.874 |
|                                | 5235     |           | 16 | 0.675 |
|                                | 8349     |           | 18 | 0.700 |
|                                | 16079    |           | 16 | 0.811 |
|                                | 17627    |           | 19 | 0.931 |
|                                | 17796    |           | 19 | 0.655 |
|                                | 18747    |           | 19 | 0.739 |
|                                | 46602    |           | 16 | 0.921 |
|                                | 88347    |           | 16 | 0.508 |
|                                | 147689   |           | 19 | 0.806 |
|                                | 169621   |           | 22 | 0.612 |
|                                | 1086954  |           | 22 | 0.681 |
|                                | 1092251  |           | 13 | 0.626 |

|                             |         |            |    |       |
|-----------------------------|---------|------------|----|-------|
|                             | 1101056 |            | 11 | 0.639 |
|                             | 1102229 |            | 20 | 0.768 |
|                             | 1107525 |            | 15 | 0.837 |
|                             | 1109864 |            | 16 | 0.746 |
|                             | 1111500 |            | 16 | 0.792 |
|                             | 1111637 |            | 17 | 0.827 |
|                             | 1112845 |            | 20 | 0.718 |
|                             | 1114798 |            | 18 | 0.720 |
|                             | 1119292 |            | 19 | 0.779 |
|                             | 1125125 |            | 18 | 0.757 |
|                             | 1127293 |            | 19 | 0.750 |
|                             | 1129790 |            | 18 | 0.718 |
|                             | 1130164 |            | 22 | 0.601 |
|                             | 1136340 |            | 30 | 0.637 |
|                             | 1138585 |            | 16 | 0.837 |
|                             | 1138588 |            | 20 | 0.788 |
|                             | 1139264 |            | 20 | 0.949 |
|                             | 1144258 |            | 20 | 0.754 |
|                             | 1144537 |            | 21 | 0.876 |
|                             | 1155954 |            | 23 | 0.884 |
|                             | 1159901 |            | 21 | 0.898 |
|                             | 1160463 |            | 16 | 0.792 |
|                             | 1160941 |            | 22 | 0.836 |
|                             | 1162118 |            | 15 | 0.899 |
|                             | 1162782 |            | 21 | 0.920 |
|                             | 1163232 |            | 16 | 0.892 |
|                             | 1163406 |            | 19 | 0.775 |
|                             | 1164830 |            | 19 | 0.849 |
|                             | 1165528 |            | 23 | 0.516 |
|                             | 1169208 |            | 16 | 0.848 |
|                             | 1169425 |            | 19 | 0.875 |
|                             | 1169823 |            | 19 | 0.826 |
|                             | 1171563 |            | 17 | 0.897 |
|                             | 1177777 |            | 16 | 0.876 |
|                             | 1198765 |            | 15 | 0.814 |
|                             | 1199549 |            | 18 | 0.955 |
| <b><i>T. asperellum</i></b> |         | <b>125</b> |    |       |
|                             | 59495   |            | 12 | 0.490 |
|                             | 22516   |            | 18 | 0.715 |
|                             | 27615   |            | 20 | 0.724 |
|                             | 28394   |            | 20 | 0.779 |
|                             | 31204   |            | 19 | 0.624 |
|                             | 31301   |            | 18 | 0.746 |



|  |       |  |    |       |
|--|-------|--|----|-------|
|  | 31425 |  | 15 | 0.890 |
|  | 32032 |  | 23 | 0.718 |
|  | 32222 |  | 17 | 0.701 |
|  | 32345 |  | 16 | 0.805 |
|  | 32550 |  | 19 | 0.746 |
|  | 36514 |  | 16 | 0.755 |
|  | 37831 |  | 17 | 0.734 |
|  | 39409 |  | 17 | 0.746 |
|  | 39645 |  | 16 | 0.792 |
|  | 42434 |  | 19 | 0.837 |
|  | 45639 |  | 19 | 0.588 |
|  | 49234 |  | 30 | 0.873 |
|  | 49818 |  | 18 | 0.643 |
|  | 52328 |  | 19 | 0.827 |
|  | 53400 |  | 23 | 0.764 |
|  | 53970 |  | 19 | 0.772 |
|  | 54018 |  | 18 | 0.795 |
|  | 54114 |  | 27 | 0.666 |
|  | 54127 |  | 19 | 0.814 |
|  | 54184 |  | 16 | 0.726 |
|  | 54328 |  | 15 | 0.826 |
|  | 54798 |  | 16 | 0.767 |
|  | 55019 |  | 24 | 0.668 |
|  | 55026 |  | 19 | 0.659 |
|  | 56705 |  | 20 | 0.771 |
|  | 57108 |  | 15 | 0.757 |
|  | 57227 |  | 15 | 0.808 |
|  | 57390 |  | 19 | 0.883 |
|  | 57392 |  | 18 | 0.596 |
|  | 57894 |  | 16 | 0.761 |
|  | 58285 |  | 16 | 0.516 |
|  | 59378 |  | 19 | 0.583 |
|  | 59451 |  | 16 | 0.894 |
|  | 59966 |  | 18 | 0.889 |
|  | 60347 |  | 19 | 0.816 |
|  | 60885 |  | 16 | 0.774 |
|  | 61323 |  | 16 | 0.875 |
|  | 61427 |  | 18 | 0.759 |
|  | 62096 |  | 20 | 0.755 |
|  | 62649 |  | 17 | 0.851 |
|  | 62892 |  | 17 | 0.684 |
|  | 62906 |  | 24 | 0.734 |
|  | 63139 |  | 22 | 0.924 |

|  |        |  |    |       |
|--|--------|--|----|-------|
|  | 63211  |  | 18 | 0.766 |
|  | 67114  |  | 22 | 0.720 |
|  | 68465  |  | 22 | 0.715 |
|  | 68659  |  | 21 | 0.749 |
|  | 69080  |  | 20 | 0.862 |
|  | 70064  |  | 19 | 0.787 |
|  | 72036  |  | 22 | 0.570 |
|  | 76519  |  | 25 | 0.584 |
|  | 77473  |  | 20 | 0.948 |
|  | 79195  |  | 19 | 0.855 |
|  | 79480  |  | 21 | 0.520 |
|  | 80972  |  | 16 | 0.871 |
|  | 83007  |  | 19 | 0.735 |
|  | 83987  |  | 18 | 0.840 |
|  | 85019  |  | 19 | 0.717 |
|  | 85087  |  | 15 | 0.698 |
|  | 90491  |  | 15 | 0.690 |
|  | 127130 |  | 19 | 0.481 |
|  | 127371 |  | 22 | 0.758 |
|  | 134808 |  | 23 | 0.491 |
|  | 137174 |  | 17 | 0.838 |
|  | 137492 |  | 16 | 0.919 |
|  | 140010 |  | 21 | 0.610 |
|  | 141005 |  | 19 | 0.802 |
|  | 144631 |  | 18 | 0.777 |
|  | 153750 |  | 23 | 0.475 |
|  | 154964 |  | 20 | 0.795 |
|  | 160296 |  | 22 | 0.860 |
|  | 167230 |  | 20 | 0.919 |
|  | 169160 |  | 16 | 0.726 |
|  | 178063 |  | 19 | 0.817 |
|  | 189193 |  | 21 | 0.766 |
|  | 192721 |  | 16 | 0.620 |
|  | 194232 |  | 18 | 0.879 |
|  | 215139 |  | 18 | 0.827 |
|  | 219551 |  | 27 | 0.515 |
|  | 223108 |  | 20 | 0.485 |
|  | 223341 |  | 20 | 0.546 |
|  | 225444 |  | 17 | 0.610 |
|  | 230258 |  | 17 | 0.665 |
|  | 245387 |  | 20 | 0.673 |
|  | 248206 |  | 20 | 0.760 |
|  | 254425 |  | 16 | 0.454 |

|                          |        |           |    |       |
|--------------------------|--------|-----------|----|-------|
|                          | 255498 |           | 18 | 0.957 |
|                          | 260136 |           | 24 | 0.530 |
|                          | 262100 |           | 15 | 0.698 |
|                          | 269305 |           | 20 | 0.468 |
|                          | 272418 |           | 17 | 0.518 |
|                          | 280186 |           | 26 | 0.576 |
|                          | 300403 |           | 22 | 0.532 |
|                          | 302363 |           | 19 | 0.805 |
|                          | 314258 |           | 22 | 0.679 |
|                          | 315796 |           | 30 | 0.794 |
|                          | 316126 |           | 26 | 0.592 |
|                          | 320233 |           | 16 | 0.650 |
|                          | 334543 |           | 17 | 0.811 |
|                          | 338113 |           | 16 | 0.621 |
|                          | 372405 |           | 25 | 0.666 |
|                          | 383665 |           | 30 | 0.509 |
|                          | 392456 |           | 18 | 0.554 |
|                          | 396221 |           | 36 | 0.576 |
|                          | 398992 |           | 18 | 0.616 |
|                          | 400716 |           | 30 | 0.596 |
|                          | 403403 |           | 16 | 0.683 |
|                          | 408531 |           | 35 | 0.491 |
|                          | 408961 |           | 20 | 0.522 |
|                          | 413218 |           | 16 | 0.669 |
|                          | 415421 |           | 20 | 0.851 |
|                          | 416739 |           | 32 | 0.656 |
|                          | 421281 |           | 23 | 0.626 |
|                          | 425737 |           | 28 | 0.573 |
|                          | 426769 |           | 17 | 0.698 |
|                          | 431832 |           | 18 | 0.648 |
|                          | 433671 |           | 15 | 0.615 |
|                          | 441255 |           | 19 | 0.548 |
|                          | 445739 |           | 20 | 0.793 |
| <b><i>T. hamatum</i></b> |        | <b>62</b> |    |       |
|                          | 35     |           | 24 | 0.833 |
|                          | 635    |           | 16 | 0.779 |
|                          | 791    |           | 26 | 0.774 |
|                          | 813    |           | 16 | 0.802 |
|                          | 834    |           | 19 | 0.742 |
|                          | 989    |           | 16 | 0.696 |
|                          | 1031   |           | 15 | 0.891 |
|                          | 1419   |           | 18 | 0.656 |
|                          | 1508   |           | 18 | 0.809 |

|  |      |  |    |       |
|--|------|--|----|-------|
|  | 1698 |  | 21 | 0.614 |
|  | 1905 |  | 15 | 0.854 |
|  | 2191 |  | 22 | 0.828 |
|  | 2619 |  | 20 | 0.882 |
|  | 2807 |  | 16 | 0.743 |
|  | 3196 |  | 17 | 0.611 |
|  | 3293 |  | 19 | 0.755 |
|  | 3374 |  | 21 | 0.852 |
|  | 3890 |  | 16 | 0.708 |
|  | 3953 |  | 17 | 0.702 |
|  | 5251 |  | 19 | 0.806 |
|  | 5324 |  | 17 | 0.669 |
|  | 5515 |  | 17 | 0.640 |
|  | 5724 |  | 17 | 0.773 |
|  | 5959 |  | 15 | 0.895 |
|  | 6082 |  | 17 | 0.892 |
|  | 6163 |  | 16 | 0.885 |
|  | 6389 |  | 18 | 0.807 |
|  | 6600 |  | 15 | 0.692 |
|  | 6613 |  | 16 | 0.895 |
|  | 6629 |  | 18 | 0.634 |
|  | 6718 |  | 18 | 0.671 |
|  | 6926 |  | 16 | 0.914 |
|  | 7100 |  | 20 | 0.763 |
|  | 7336 |  | 17 | 0.811 |
|  | 7432 |  | 17 | 0.768 |
|  | 7665 |  | 20 | 0.851 |
|  | 7782 |  | 19 | 0.503 |
|  | 7788 |  | 24 | 0.668 |
|  | 8228 |  | 20 | 0.948 |
|  | 8489 |  | 23 | 0.760 |
|  | 8598 |  | 17 | 0.671 |
|  | 8703 |  | 16 | 0.677 |
|  | 8815 |  | 17 | 0.618 |
|  | 8822 |  | 16 | 0.826 |
|  | 9237 |  | 16 | 0.790 |
|  | 9238 |  | 18 | 0.584 |
|  | 9380 |  | 17 | 0.757 |
|  | 9451 |  | 19 | 0.759 |
|  | 9566 |  | 20 | 0.805 |
|  | 9721 |  | 21 | 0.707 |
|  | 9748 |  | 18 | 0.647 |
|  | 9950 |  | 20 | 0.947 |

|  |       |  |    |       |
|--|-------|--|----|-------|
|  | 10003 |  | 16 | 0.783 |
|  | 10072 |  | 19 | 0.912 |
|  | 10211 |  | 17 | 0.728 |
|  | 10454 |  | 21 | 0.782 |
|  | 10462 |  | 15 | 0.904 |
|  | 10494 |  | 18 | 0.777 |
|  | 10534 |  | 17 | 0.632 |
|  | 10667 |  | 21 | 0.785 |
|  | 10669 |  | 18 | 0.766 |
|  | 10727 |  | 20 | 0.822 |

## References

- Djonovic S, Pozo MJ, Dangott LJ, Howell CR & Kenerley CM (2006) Sm1, a proteinaceous elicitor secreted by the biocontrol fungus *Trichoderma virens* induces plant defense responses and systemic resistance. *Mol Plant Microbe In* **19**: 838-853.
- Gaderer R, Bonazza K & Seidl-Seiboth V (2014) Cerato-platanins: a fungal protein family with intriguing properties and application potential. *Appl Microbiol Biot* **98**: 4795-4803.
- Gaderer R, Lamdan NL, Frischmann A, Sulyok M, Krska R, Horwitz BA & Seidl-Seiboth V (2015) Sm2, a paralog of the *Trichoderma* cerato-platanin elicitor Sm1, is also highly important for plant protection conferred by the fungal-root interaction of *Trichoderma* with maize. *BMC Microbiol* **15**.
- Kubicek CP, Baker S, Gamauf C, Kenerley CM & Druzhinina IS (2008) Purifying selection and birth-and-death evolution in the class II hydrophobin gene families of the ascomycete *Trichoderma/Hypocrea*. *BMC Evol Biol* **8**.
- Linder MB, Szilvay GR, Nakari-Setälä T & Penttilä ME (2005) Hydrophobins: the protein-amphiphiles of filamentous fungi. *FEMS Microbiol Rev* **29**: 877-896.
- Seidl-Seiboth V, Gruber S, Sezerman U, Schwecke T, Albayrak A, Neuhof T, von Dohren H, Baker SE & Kubicek CP (2011) Novel Hydrophobins from *Trichoderma* Define a New Hydrophobin Subclass: Protein Properties, Evolution, Regulation and Processing. *J Mol Evol* **72**: 339-351.
- Stergiopoulos I & de Wit PJGM (2009) Fungal Effector Proteins. *Annu Rev Phytopathol* **47**: 233-263.
- Vizcaino JA, Redondo J, Suarez MB, Cardoza RE, Hermosa R, Gonzalez FJ, Rey M & Monte E (2007) Generation, annotation, and analysis of ESTs from four different *Trichoderma* strains grown under conditions related to biocontrol. *Appl Microbiol Biot* **75**: 853-862.
- Wosten HAB (2001) Hydrophobins: Multipurpose proteins. *Annu Rev Microbiol* **55**: 625-646.
