# Supplementary material for: Evolution and comparative genomics of the most common Trichoderma species
Source: BMC Genomics. 2019 Jun 12;20:485. doi: 10.1186/s12864-019-5680-7 (PMC6560777; doi:10.1186/s12864-019-5680-7)
Supplement: Supplementary file 11 — Gene clusters gained or lost in the evolution of Hypocreaceae before the origin of Trichoderma. (XLSX 24 kb) [file 12864_2019_5680_MOESM11_ESM.xlsx]

## Sheet: gained and lost genes
Gene clusters gained or lost in the evolution of Hypocreaceae before the origin of Trichoderma
CLADE	CLUSTER	PFAM	Viterbi p-value	NODE count	PARENT count	gain/loss
node 17, Trichoderma genus ancestor	1	HET-S,NACHT,NACHT_N,PNP_UDP_1,WD40	0.000097	14	5	9
	2	Ank_2,Ank_4,Ank_5,Asp,NACHT,PNP_UDP_1	0.001608	10	4	6
	40	PNP_UDP_1,SesA	0.001252	5	1	4
	22	adh_short	0.004231	6	2	4
	14	ADH_N,ADH_zinc_N	0.008822	7	3	4
	34	WD40	0.015361	5	2	3
	17	NB-ARC,Nuc_deoxyri_tr2,TPR_10,TPR_12	0.015361	5	2	3
	614	Ank_2,Ank_4,NACHT,NACHT_N	0.024370	3	1	2
	205	Ank_2,Ank_4,Ank_5,NACHT	0.024370	3	1	2
	137	NB-ARC,PNP_UDP_1,TPR_10,TPR_12	0.024370	3	1	2
	131	NACHT	0.024370	3	1	2
	84	Amidase	0.024370	3	1	2
	52	3Beta_HSD,Epimerase	0.024370	3	1	2
node 25, Trichoderma / E. weberi ancestor	76	DEAD,Helicase_C	0.042771	1	3	-2
node 26, E. weberi	2	Ank_2,Ank_4,Ank_5,Asp,NACHT,PNP_UDP_1	0.019530	0	4	-4
	4	ABC_membrane,ABC_tran	0.006606	0	5	-5
	1	HET-S,NACHT,NACHT_N,PNP_UDP_1,WD40	0.006606	0	5	-5
node 27, All Trichoderma spp. /Eweberi /Metarhizium /Cpurpurea /Osinensis ancestor	no cluster
node 28, M. acridum	300	Ank_2,Ank_4,Ank_5,SRP9-21	0.008309	4	2	2
	371	noPFAM	0.029446	2	1	1
	22	adh_short	0.029446	2	1	1
	324	Dimer_Tnp_hAT	0.006424	1	3	-2
	262	Dimer_Tnp_hAT,MULE	0.006424	1	3	-2
	63	LysM	0.002446	0	2	-2
	29	p450	0.018422	3	5	-2
	2	Ank_2,Ank_4,Ank_5,Asp,NACHT,PNP_UDP_1	0.034263	5	7	-2
	212	Helitron_like_N,PIF1	0.002446	3	6	-3
	5	Ank_2,Ank_4,Ank_5	0.007715	6	9	-3
node 29, Metarhizium ancestor	5	Ank_2,Ank_4,Ank_5	0.010417	9	4	5
	327	PAD	0.005626	6	2	4
	324	Dimer_Tnp_hAT	0.028470	3	1	2
	262	Dimer_Tnp_hAT,MULE	0.028470	3	1	2
node 30, M. robertsii	262	Dimer_Tnp_hAT,MULE	0.000000	13	3	10
	5	Ank_2,Ank_4,Ank_5	0.000000	17	9	8
	212	Helitron_like_N,PIF1	0.000001	13	6	7
	324	Dimer_Tnp_hAT	0.000000	9	3	6
	327	PAD	0.000059	11	6	5
	103	Exo_endo_phos_2,RVT_1	0.000006	5	1	4
	2	Ank_2,Ank_4,Ank_5,Asp,NACHT,PNP_UDP_1	0.001039	11	7	4
	63	LysM	0.000376	5	2	3
	51	Glyco_hydro_18,Hce2	0.000376	5	2	3
	24	MFS_1	0.000376	5	2	3
	196	DDE_1,HTH_Tnp_Tc5,Helicase_C	0.001740	3	1	2
	44	MFS_1	0.001740	3	1	2
	23	ADH_zinc_N	0.018390	5	3	2
	17	NB-ARC,Nuc_deoxyri_tr2,TPR_10,TPR_12	0.001740	3	1	2
	14	ADH_N,ADH_zinc_N	0.001740	3	1	2
	12	MFS_1	0.030965	6	4	2
	3	HET,Ribonuc_L-PSP	0.018390	5	3	2
	1368	BAG	0.029446	2	1	1
	462	DUF2841	0.029446	2	1	1
	429	DUF3425	0.029446	2	1	1
	307	CBFD_NFYB_HMF	0.029446	2	1	1
	243	Fructosamin_kin	0.029446	2	1	1
	224	AAA_11,AAA_12	0.029446	2	1	1
	205	Ank_2,Ank_4,Ank_5,NACHT	0.029446	2	1	1
	137	NB-ARC,PNP_UDP_1,TPR_10,TPR_12	0.029446	2	1	1
	83	Amidase	0.029446	2	1	1
	66	noPFAM	0.029446	2	1	1
	60	NAD_binding_10,NmrA	0.029446	2	1	1
	52	3Beta_HSD,Epimerase	0.029446	2	1	1
node 31, Metarhizium/C. purpurea ancestor	76	DEAD,Helicase_C	0.017502	6	3	3
	321	SET	0.013155	3	1	2
node 32, C. purpurea	321	SET	0.000000	31	3	28
	76	DEAD,Helicase_C	0.000002	21	6	15
	312	Pkinase	0.000024	15	4	11
	388	Dimer_Tnp_hAT	0.008484	6	2	4
	37	noPFAM	0.016379	7	3	4
	7320	RVT_2	0.009923	4	1	3
	3010	GCR1_C,NDC10_II	0.035680	3	1	2
	8	p450	0.008853	0	4	-4
	5	Ank_2,Ank_4,Ank_5	0.008853	0	4	-4
	4	ABC_membrane,ABC_tran	0.047988	2	6	-4
	2	Ank_2,Ank_4,Ank_5,Asp,NACHT,PNP_UDP_1	0.008853	0	4	-4
node 33, Metarhizium/C. purpurea/O. sinensis ancestor	no cluster
node 34, O. sinensis	no cluster
node 35, Hypocreaceae, Ophiocordycipitaceae and Clavicipitaceae	no cluster
node 36, B. bassiana	6658	DUF3435	0.000029	8	2	6
	5	Ank_2,Ank_4,Ank_5	0.000480	11	5	6
	325	Dimer_Tnp_hAT	0.000457	8	3	5
	103	Exo_endo_phos_2,RVT_1	0.000950	6	2	4
	327	PAD	0.043639	8	5	3
	158	Ank_2,Ank_4,Ank_5,NACHT	0.001635	4	1	3
node 37, B. bassiana/C. militaris ancestor	4	ABC_membrane,ABC_tran	0.000116	21	7	14
	327	PAD	0.043398	5	2	3
	22	ADH_zinc_N	0.043398	5	2	3
node 38, C. militaris	83	Amidase	0.000168	7	2	5
	6658	DUF3435	0.019906	0	2	-2
	324	Dimer_Tnp_hAT	0.044571	1	3	-2
	103	Exo_endo_phos_2,RVT_1	0.019906	0	2	-2
	34	WD40	0.019906	0	2	-2
	5	Ank_2,Ank_4,Ank_5	0.021308	2	5	-3
node 39, Hypocreales ancestor	no cluster
node 40, F. fujikuroi	7320	RVT_2	0.000000	11	1	10
	243	Fructosamin_kin	0.000300	3	1	2
	224	AAA_11,AAA_12	0.003416	5	3	2
	40	PNP_UDP_1,SesA	0.003416	5	3	2
	6376	HET	0.036162	0	1	-1
	3039	HET	0.036162	0	1	-1
	614	Ank_2,Ank_4,NACHT,NACHT_N	0.036162	0	1	-1
	339	WD40	0.036162	0	1	-1
	76	DEAD,Helicase_C	0.036162	0	1	-1
	681	Ldh_1_C,Ldh_1_N	0.000355	0	2	-2
	587	HOOK	0.001004	1	3	-2
	51	Glyco_hydro_18,Hce2	0.001004	1	3	-2
	611	noPFAM	0.000039	1	4	-3
	214	Pkinase	0.000039	1	4	-3
	49	Abhydrolase_3	0.001473	9	12	-3
	26	adh_short,adh_short_C2	0.001473	9	12	-3
	24	MFS_1	0.001857	10	13	-3
	2	Ank_2,Ank_4,Ank_5,Asp,NACHT,PNP_UDP_1	0.001140	8	11	-3
	433	PBD,Pkinase	0.000002	1	5	-4
	387	noPFAM	0.000002	1	5	-4
	137	NB-ARC,PNP_UDP_1,TPR_10,TPR_12	0.000009	3	7	-4
	9	Amidase	0.000277	12	16	-4
	4	ABC_membrane,ABC_tran	0.000165	10	14	-4
	376	GATA,PAS_3	0.000000	1	6	-5
	370	noPFAM	0.000000	1	6	-5
	817	TrkH	0.000000	2	8	-6
	462	DUF2841	0.000000	1	7	-6
	444	AhpC-TSA,Kelch_3	0.000000	1	7	-6
	432	FHA,Pkinase	0.000000	1	7	-6
	269	ApbA,ApbA_C	0.000000	1	7	-6
	414	Ldh_1_C,Ldh_1_N	0.000000	1	8	-7
	410	GDPD	0.000000	1	8	-7
	402	noPFAM	0.000000	1	8	-7
	374	noPFAM	0.000000	1	8	-7
	5	Ank_2,Ank_4,Ank_5	0.000000	2	9	-7
	354	LsmAD	0.000000	1	9	-8
	307	CBFD_NFYB_HMF	0.000000	1	9	-8
	157	ATG11	0.000000	1	11	-10
	162	CRC_subunit	0.000000	1	15	-14
node 41, F. fujikuroi/F. verticillioides ancestor	4409	noPFAM	0.012456	4	3	1
	29	p450	0.037260	10	9	1
	7297	noPFAM	0.012389	0	1	-1
	6658	DUF3435	0.012389	0	1	-1
	6589	noPFAM	0.012389	0	1	-1
	3010	GCR1_C,NDC10_II	0.012389	0	1	-1
	430	DUF3425	0.024506	1	2	-1
	388	Dimer_Tnp_hAT	0.012389	0	1	-1
	374	noPFAM	0.024506	1	2	-1
	337	Cys_Met_Meta_PP	0.036358	2	3	-1
	330	Pkinase	0.036358	2	3	-1
	324	Dimer_Tnp_hAT	0.012389	0	1	-1
	262	Dimer_Tnp_hAT,MULE	0.012389	0	1	-1
	196	DDE_1,HTH_Tnp_Tc5,Helicase_C	0.047951	3	4	-1
	131	NACHT	0.047951	3	4	-1
	123	HSP20	0.024506	1	2	-1
	103	Exo_endo_phos_2,RVT_1	0.012389	0	1	-1
	212	Helitron_like_N,PIF1	0.000037	0	2	-2
	76	DEAD,Helicase_C	0.000108	1	3	-2
	1	HET-S,NACHT,NACHT_N,PNP_UDP_1,WD40	0.000729	5	7	-2
node 42, F. verticilloides	366	SRP54,SRP54_N,SRP_SPB	0.000000	26	1	25
	157	ATG11	0.000000	36	11	25
	353	Pox_MCEL	0.000000	25	1	24
	853	DUF1932	0.000000	15	1	14
	387	noPFAM	0.000000	18	5	13
	771	YTH	0.000000	13	1	12
	587	HOOK	0.000000	14	3	11
	376	GATA,PAS_3	0.000000	17	6	11
	432	FHA,Pkinase	0.000000	17	7	10
	4409	noPFAM	0.000000	12	4	8
	1368	BAG	0.000000	9	2	7
	354	LsmAD	0.000000	16	9	7
	410	GDPD	0.000000	14	8	6
	160	CRC_subunit	0.000003	21	15	6
	137	NB-ARC,PNP_UDP_1,TPR_10,TPR_12	0.000000	13	7	6
	462	DUF2841	0.000002	12	7	5
	444	AhpC-TSA,Kelch_3	0.017248	9	7	2
	414	Ldh_1_C,Ldh_1_N	0.021872	10	8	2
	374	noPFAM	0.021872	10	8	2
	51	Glyco_hydro_18,Hce2	0.003416	5	3	2
	6376	HET	0.012247	2	1	1
	214	Pkinase	0.048855	5	4	1
	7320	RVT_2	0.036162	0	1	-1
	438	NACHT	0.001941	2	4	-2
	34	WD40	0.001941	2	4	-2
	3	HET,Ribonuc_L-PSP	0.026675	13	15	-2
	198	DDE_1,HTH_Tnp_Tc5,Helicase_C	0.000012	0	3	-3
	16	RTA1	0.001857	10	13	-3
	128	CHAT	0.000000	4	13	-9
node 44, F. oxysporum	76	DEAD,Helicase_C	0.000000	28	3	25
	324	Dimer_Tnp_hAT	0.000000	23	1	22
	374	noPFAM	0.000000	22	2	20
	681	Ldh_1_C,Ldh_1_N	0.000000	21	2	19
	330	Pkinase	0.000000	21	3	18
	3010	GCR1_C,NDC10_II	0.000000	18	1	17
	563	2OG-FeII_Oxy_2,Isochorismatase	0.000000	18	1	17
	463	noPFAM	0.000000	18	1	17
	72	Fungal_trans	0.000000	22	5	17
	6589	noPFAM	0.000000	17	1	16
	429	DUF3425	0.000000	18	2	16
	196	DDE_1,HTH_Tnp_Tc5,Helicase_C	0.000000	20	4	16
	66	noPFAM	0.000000	26	10	16
	269	ApbA,ApbA_C	0.000000	22	7	15
	623	2-Hacid_dh_C	0.000000	15	1	14
	24	MFS_1	0.000000	28	14	14
	901	Dynein_light	0.000000	14	1	13
	388	Dimer_Tnp_hAT	0.000000	14	1	13
	337	Cys_Met_Meta_PP	0.000000	16	3	13
	17	NB-ARC,Nuc_deoxyri_tr2,TPR_10,TPR_12	0.000000	19	6	13
	128	CHAT	0.000000	25	13	12
	1	HET-S,NACHT,NACHT_N,PNP_UDP_1,WD40	0.000000	19	7	12
	438	NACHT	0.000000	14	4	10
	610	noPFAM	0.000000	14	4	10
	434	PBD,Pkinase	0.000000	15	5	10
	262	Dimer_Tnp_hAT,MULE	0.000000	11	1	10
	123	HSP20	0.000000	12	2	10
	26	adh_short,adh_short_C2	0.000000	22	12	10
	8	p450	0.000000	19	9	10
	103	Exo_endo_phos_2,RVT_1	0.000000	10	1	9
	60	NAD_binding_10,NmrA	0.000000	16	7	9
	9	Amidase	0.000000	25	16	9
	817	TrkH	0.000000	16	8	8
	239	noPFAM	0.000000	13	5	8
	212	Helitron_like_N,PIF1	0.000000	10	2	8
	402	noPFAM	0.000000	15	8	7
	162	CRC_subunit	0.000001	22	15	7
	44	MFS_1	0.000000	9	2	7
	16	RTA1	0.000001	21	14	7
	2	Ank_2,Ank_4,Ank_5,Asp,NACHT,PNP_UDP_1	0.000000	18	11	7
	374	noPFAM	0.000001	14	8	6
	327	PAD	0.000000	8	2	6
	307	CBFD_NFYB_HMF	0.000001	15	9	6
	5	Ank_2,Ank_4,Ank_5	0.000001	15	9	6
	6658	DUF3435	0.000000	6	1	5
	444	AhpC-TSA,Kelch_3	0.000007	12	7	5
	34	WD40	0.000002	10	5	5
	4	ABC_membrane,ABC_tran	0.000119	19	14	5
	370	noPFAM	0.000068	10	6	4
	52	3Beta_HSD,Epimerase	0.000068	10	6	4
	49	Abhydrolase_3	0.000777	16	12	4
	23	ADH_zinc_N	0.000188	12	8	4
	7306	noPFAM	0.000017	4	1	3
	414	Ldh_1_C,Ldh_1_N	0.002901	11	8	3
	131	NACHT	0.000423	7	4	3
	410	GDPD	0.035557	10	8	2
	22	adh_short	0.015576	7	5	2
	7320	RVT_2	0.047569	0	1	-1
	614	Ank_2,Ank_4,NACHT,NACHT_N	0.047569	0	1	-1
	312	Pkinase	0.047569	0	1	-1
	29	p450	0.017660	7	9	-2
node 45, F. fujifukuroi/F. verticillioides/F. oxysporum	35	noPFAM	0.037279	9	6	3
	198	DDE_1,HTH_Tnp_Tc5,Helicase_C	0.006884	3	1	2
	3046	HET	0.027584	1	3	-2
node 46, F. graminearum	438	NACHT	0.039230	1	3	-2
	414	Ldh_1_C,Ldh_1_N	0.039230	1	3	-2
	410	GDPD	0.039230	1	3	-2
	402	noPFAM	0.039230	1	3	-2
	374	noPFAM	0.039230	1	3	-2
	370	noPFAM	0.039230	1	3	-2
	354	LsmAD	0.039230	1	3	-2
	307	CBFD_NFYB_HMF	0.039230	1	3	-2
	212	Helitron_like_N,PIF1	0.017263	0	2	-2
	162	CRC_subunit	0.039230	1	3	-2
	137	NB-ARC,PNP_UDP_1,TPR_10,TPR_12	0.017263	0	2	-2
	72	Fungal_trans	0.039230	1	3	-2
	44	MFS_1	0.017263	0	2	-2
	76	DEAD,Helicase_C	0.004391	0	3	-3
	52	3Beta_HSD,Epimerase	0.017927	2	5	-3
	14	ADH_N,ADH_zinc_N	0.027762	3	6	-3
	2	Ank_2,Ank_4,Ank_5,Asp,NACHT,PNP_UDP_1	0.039057	4	7	-3
	60	NAD_binding_10,NmrA	0.005244	2	6	-4
	49	Abhydrolase_3	0.017424	5	9	-4
	24	MFS_1	0.017424	5	9	-4
	12	MFS_1	0.017424	5	9	-4
	5	Ank_2,Ank_4,Ank_5	0.005244	2	6	-4
	26	adh_short,adh_short_C2	0.001284	3	8	-5
node 47, Fusarium ancestor	3	HET,Ribonuc_L-PSP	0.000002	21	5	16
	16	RTA1	0.000241	14	4	10
	66	noPFAM	0.000056	9	1	8
	49	Abhydrolase_3	0.000718	9	2	7
	24	MFS_1	0.000718	9	2	7
	128	CHAT	0.000527	7	1	6
	60	NAD_binding_10,NmrA	0.000527	7	1	6
	15	HET	0.004421	9	3	6
	9	Amidase	0.004421	9	3	6
	26	adh_short,adh_short_C2	0.010766	8	3	5
	12	MFS_1	0.028628	9	4	5
	52	3Beta_HSD,Epimerase	0.004991	5	1	4
	14	ADH_N,ADH_zinc_N	0.014076	6	2	4
	131	NACHT	0.015355	4	1	3
	66	noPFAM	0.036311	5	2	3
	34	WD40	0.036311	5	2	3
	21	adh_short	0.036311	5	2	3
	3039	HET	0.047242	3	1	2
	438	NACHT	0.047242	3	1	2
	370	noPFAM	0.047242	3	1	2
	239	noPFAM	0.047242	3	1	2
node 48, N. haematoccoca	3	HET,Ribonuc_L-PSP	0.000000	60	21	39
	3039	HET	0.000000	18	3	15
	15	HET	0.000016	22	9	13
	16	RTA1	0.000339	26	14	12
	60	NAD_binding_10,NmrA	0.000073	18	7	11
	131	NACHT	0.000163	12	4	8
	52	3Beta_HSD,Epimerase	0.003560	11	5	6
	14	ADH_N,ADH_zinc_N	0.006938	12	6	6
	12	MFS_1	0.014594	15	9	6
	212	Helitron_like_N,PIF1	0.002806	8	3	5
	49	Abhydrolase_3	0.040204	14	9	5
	24	MFS_1	0.040204	14	9	5
	6376	HET	0.001307	5	1	4
	21	adh_short	0.030862	9	5	4
	1368	BAG	0.015789	5	2	3
	243	Fructosamin_kin	0.024880	3	1	2
	83	Amidase	0.024880	3	1	2
node 50, C. globosum	103	Exo_endo_phos_2,RVT_1	0.000000	52	10	42
	196	DDE_1,HTH_Tnp_Tc5,Helicase_C	0.000000	32	6	26
	262	Dimer_Tnp_hAT,MULE	0.000001	25	5	20
	388	Dimer_Tnp_hAT	0.000004	23	5	18
	212	Helitron_like_N,PIF1	0.000085	19	5	14
	17	NB-ARC,Nuc_deoxyri_tr2,TPR_10,TPR_12	0.011637	12	5	7
	2	Ank_2,Ank_4,Ank_5,Asp,NACHT,PNP_UDP_1	0.007658	11	4	7
	3010	GCR1_C,NDC10_II	0.001403	7	1	6
	324	Dimer_Tnp_hAT	0.004603	8	2	6
	1	HET-S,NACHT,NACHT_N,PNP_UDP_1,WD40	0.015232	10	4	6
	5	Ank_2,Ank_4,Ank_5	0.019534	8	3	5
	243	Fructosamin_kin	0.039780	7	3	4
	23	ADH_zinc_N	0.023812	6	2	4
	131	NACHT	0.024436	4	1	3
node 51, C. globosum/N. crassa	103	Exo_endo_phos_2,RVT_1	0.011420	10	4	6
node 52, N. crassa	1	HET-S,NACHT,NACHT_N,PNP_UDP_1,WD40	0.049976	0	4	-4
	388	Dimer_Tnp_hAT	0.019544	0	5	-5
	262	Dimer_Tnp_hAT,MULE	0.019544	0	5	-5
	212	Helitron_like_N,PIF1	0.019544	0	5	-5
	196	DDE_1,HTH_Tnp_Tc5,Helicase_C	0.007804	0	6	-6
	103	Exo_endo_phos_2,RVT_1	0.000135	0	10	-10
